1 **Morphometric relationships and their contribution to biomass and cannabinoid yield in**  
2 **hybrids of hemp (*Cannabis sativa*)**

3

4 Craig H. Carlson<sup>1</sup>, George M. Stack<sup>1</sup>, Yu Jiang<sup>1</sup>, Bircan Taşkıran<sup>1,\*</sup>, Ali R. Cala<sup>2</sup>, Jacob A.  
5 Toth<sup>1</sup>, Glenn Philippe<sup>3</sup>, Jocelyn K.C. Rose<sup>3</sup>, Christine D. Smart<sup>2</sup>, Lawrence B. Smart<sup>1§</sup>

6

7 <sup>1</sup>Horticulture Section, School of Integrative Plant Science, Cornell University, Geneva, NY

8 <sup>2</sup>Plant Pathology and Plant-Microbe Biology Section, School of Integrative Plant Science,  
9 Cornell University, Geneva, NY

10 <sup>3</sup>Plant Biology Section, School of Integrative Plant Science, Cornell University, Ithaca, NY

11 \*Current affiliation: Biology Department, Faculty of Science, Çankırı Karatekin University,  
12 Çankırı, Turkey

13

14 **§Corresponding Author:**

15 Lawrence B. Smart

16 Address: 630 West North Street, Geneva, NY, 14456

17 Phone: 315-787-2490

18 E-mail: [lbs33@cornell.edu](mailto:lbs33@cornell.edu)

19

20 **Author Contact Information:**

21 CHC: [chc89@cornell.edu](mailto:chc89@cornell.edu)

22 GMS: [gms252@cornell.edu](mailto:gms252@cornell.edu)

23 YJ: [yj522@cornell.edu](mailto:yj522@cornell.edu)

24 BT: [bircantaskiran@karatekin.edu.tr](mailto:bircantaskiran@karatekin.edu.tr)

25 ARC: [arc285@cornell.edu](mailto:arc285@cornell.edu)

26 JAT: [jat363@cornell.edu](mailto:jat363@cornell.edu)

27 GP: [gp376@cornell.edu](mailto:gp376@cornell.edu)

28 JKCR: [jr286@cornell.edu](mailto:jr286@cornell.edu)

29 CDS: [cgs14@cornell.edu](mailto:cds14@cornell.edu)

30 LBS: [lbs33@cornell.edu](mailto:lbs33@cornell.edu) 0000-0002-7812-7736

31

32 **Submission Date:** May 7, 2021

33

34 **Tables:** 2

35 **Figures:** 6

36 **Supplementary Tables:** 4

37 **Supplementary Figures:** 8

38 **Word Count:** 5,482

39

40 **Running Title:** Morphometric relationships in hemp hybrids

41

42 **Highlight**

43 Stem and canopy architecture traits are superior predictors of floral biomass yield and offer a  
44 good indication of hybrid uniformity in field plantings of genetically diverse cannabinoid hemp  
45 populations.

46

47

48

49

50

51

52

53

54

55

56

57

58

59

60

61

62

63

64 **Abstract**

65 The breeding of hybrid cultivars of hemp (*Cannabis sativa* L.) is not well described, especially  
66 the segregation and inheritance of traits that are important for yield. A total of 23 families were  
67 produced from genetically diverse parents to investigate the inheritance of morphological traits  
68 and their association with biomass accumulation and cannabinoid yield. In addition, a novel  
69 classification method for canopy architecture was developed. The strong linear relationship  
70 between wet and dry biomass provided an accurate estimate of final dry stripped floral biomass.  
71 Of all field and aerial measurements, basal stem diameter was determined to be the single best  
72 selection criterion for final dry stripped floral biomass yield. Along with stem diameter, canopy  
73 architecture and stem growth predictors described the majority of the explainable variation of  
74 biomass yield. Within-family variance for morphological and cannabinoid measurements  
75 reflected the heterozygosity of the parents. While selfed populations suffered from inbreeding  
76 depression, hybrid development in hemp will require at least one inbred parent to achieve  
77 uniform growth and biomass yield. Nevertheless, floral phenology remains a confounding factor  
78 in selection because of its underlying influence on biomass production highlighting the need to  
79 understand the genetic basis for flowering time in the breeding of uniform cultivars.

80 **Keywords:** allometry, biomass, cannabinoid, *Cannabis sativa*, hemp, high-throughput  
81 phenotyping, multiple regression, plant architecture, stem diameter, unmanned aerial systems

82

83

84

85

86

87

88

89 **Abbreviations**

|     |         |                                                   |
|-----|---------|---------------------------------------------------|
| 90  | AUDPC:  | Area under the disease progress curve             |
| 91  | CBC:    | Cannabichromene                                   |
| 92  | CBD:    | Cannabidiol                                       |
| 93  | CBDV:   | Cannabidivarin                                    |
| 94  | CBG:    | Cannabigerol                                      |
| 95  | CBL:    | Cannabicyclol                                     |
| 96  | CBN:    | Cannabinol                                        |
| 97  | DAP:    | Days after planting                               |
| 98  | DBM:    | Total dry biomass                                 |
| 99  | DSBM:   | Total dry stripped floral biomass                 |
| 100 | EVI:    | Enhanced vegetation index                         |
| 101 | GCI:    | Green chlorophyll index                           |
| 102 | GDVI:   | Generalized difference vegetation index           |
| 103 | HTP:    | High-throughput phenotyping                       |
| 104 | MNLI:   | Modified nonlinear vegetation index               |
| 105 | MSAVI2: | Modified secondary soil-adjusted vegetation index |
| 106 | NDVI:   | Normalized difference vegetation index            |
| 107 | OSAVI:  | Optimized soil-adjusted vegetation index          |
| 108 | PM:     | Hemp powdery mildew                               |
| 109 | THC:    | Tetrahydrocannabinol                              |
| 110 | THCV:   | Tetrahydrocannabivarin                            |
| 111 | UAS:    | Unmanned aerial system                            |
| 112 | WBM:    | Total wet biomass                                 |

113

114

## 115 **Introduction**

116 Hemp (*Cannabis sativa* L.) is a multipurpose crop with incipient potential in diverse markets.  
117 Hemp is a dioecious annual ( $2n=20$ ) (Hirata, 1924) that along with *Humulus* spp., diverged from  
118 a common ancestor ca. 27 million years ago (McPartland, 2018). Generally thought to have been  
119 domesticated in Central Asia, its spatial distribution was reshaped by humans who have used it  
120 for millennia as a source of food, fiber, and medicine (Vavilov, 1926; Warf, 2014). The current  
121 scientific consensus is that the genus is monotypic (Small, 1972), however, niche populations do  
122 exist, primarily differentiated by latitude. What are likely remnants of early 20th century  
123 cultivation of fiber hemp, naturalized, locally-adapted populations can be found throughout the  
124 US. Nevertheless, collection and genetic characterization of wild populations has been extremely  
125 limited (Wenger *et al.*, 2020), especially those in the native range (Soorni *et al.*, 2017).

126 While hemp is dioecious with male heterogamety (XY) (Moliterni *et al.*, 2004), instances of  
127 monoecy are commonplace. In an effort to increase grain yield, monoecious cultivars were first  
128 developed in European breeding programs. Monoecy is expressed in homogametic females (XX)  
129 but the ratio of staminate to pistillate flowers is quantitative and under autosomal control  
130 (XX+A) (Menzel, 1964). Presently, the genomic basis of sex determination (Petit *et al.*, 2020)  
131 and monoecious expression (Faux *et al.*, 2014) in *C. sativa* is not well understood. While  
132 monoecious cultivars are favored in grain production, all-female populations are preferred by  
133 growers of cannabinoid hemp because pollination can dramatically reduce cannabinoid yield  
134 (Small, 2015). Feminized populations are routinely produced by application of an ethylene  
135 inhibitor to one of the two female parents of a cross, which stimulates staminate flower  
136 formation, and all-female progeny that lack Y chromosomes. This simple technique, pioneered  
137 by Ram and Sett (1982), is effective and has changed little over time (Lubell and Brand, 2018).  
138 Repeated cycles of self-pollination using this technique will lead to increased homozygosity and  
139 possible inbreeding depression (Kurtz *et al.*, 2020).

140 Floral phenology is an important component in hemp breeding programs because substantial  
141 variation can affect the uniformity of cultivar populations (Stack *et al.*, 2021). Phenological  
142 descriptors for hemp are often unclear because of latitudinal variance in light conditions.  
143 Cultivars are considered to be photoperiod-sensitive when time-to-flower depends on the night  
144 length threshold, which can range from 8 to 12 hours (Hall *et al.*, 2014; Moher *et al.*, 2021).

145 These cultivars can maintain vegetative growth indefinitely if a night length of less than the  
146 critical threshold is maintained. For photoperiod insensitive cultivars (day neutral), flowering is  
147 dependent on other factors, like plant maturity. Day neutrality is advantageous at high latitudes,  
148 where the growing season is short, and at low latitudes, where daylength is insufficient to  
149 synchronize flowering. At mid-latitude growing regions, populations derived from higher  
150 latitudes begin within a few weeks after germination, while those from equatorial latitudes  
151 remain vegetative for many months. Historic latitudinal adaptation and recent admixture have led  
152 to complex epistatic interactions between the genetic factors controlling flowering in hemp.  
153 Since flowering time is of such importance for hemp yield and cultivar adaptation, there is  
154 considerable interest in identifying genes responsible for variation of the trait (Petit *et al.*, 2020).

155 Hemp is overall more genetically diverse and heterozygous than high-THC varieties of *C. sativa*  
156 (Sawler *et al.*, 2015). Substantial admixture coupled with few founders has narrowed the genetic  
157 base of drug-type germplasm, which is relatively distinct from natural hemp populations.

158 Cannabinoid hemp cultivars bred for CBD production were derived from crossing fiber hemp  
159 with high-THC lines to take advantage of the historical selection for increased total cannabinoid  
160 content (van Bakel *et al.*, 2011; Grassa *et al.*, 2021). There has been relatively little analysis of  
161 the genetic diversity and heterozygosity of hemp based on founder breeding pedigrees or market  
162 class. When considering the development of hybrid cultivars of hemp, it will be important to  
163 understand whether there are heterotic groups and if there are correlations between hybrid  
164 progeny performance and genetic relatedness of the parents, as there are in maize (Marsan *et al.*,  
165 1998).

166 At present, there is no ideotype for cannabinoid hemp because optimized agronomic  
167 management practices and efficient harvesting equipment have yet to be established. Hemp  
168 cultivation in the US mainly uses transplants of greenhouse-grown seedlings or rooted cuttings  
169 frequently grown in plasticulture with wide row (2-3 m) and in-row (0.8-1.2 m) spacing. As the  
170 market evolves, it is likely that cannabinoid cultivation will move towards direct-seeded, high-  
171 density plantings. However, improvements in the efficiency of feminized seed production would  
172 be needed to achieve this. Nevertheless, emerging markets will continue to support small farmers  
173 and niche products, such as growing cultivars with diverse cannabinoid and terpene profiles  
174 (Andre *et al.*, 2016).

175 While there is no consensus on how best to integrate aspects of plant architecture as selection  
176 criteria in contemporary hemp breeding programs, it has been somewhat altered by  
177 domestication (Clark and Merlin, 2016). Today, there are three major hemp market classes (Fike  
178 *et al.*, 2020) that are defined by their primary end-product: grain, fiber, and cannabinoids. In  
179 general, grain hemp cultivars have been selected for early maturity and large seed size, fiber  
180 hemp for unbranched stalks and long internodes, and cannabinoid hemp for maximum flower  
181 yield, which are profusely branched and have shorter internodes. Early selection of cannabinoid  
182 hemp before terminal flowering is a challenging because the primary harvestable end-product,  
183 the inflorescence, does not form until the critical photoperiod is exceeded. If intensive early  
184 selections could be made before floral initiation, those individuals could be vegetatively  
185 propagated, then crossed to improve genetic gain, rather than making selections after pollination  
186 has occurred. The identification of a suite of traits that are evident early in plant growth and  
187 development, which are associated with desired end of season morphology, could provide  
188 informative phenotypes for indirect selection. At present, there are few experimental reports that  
189 have focused on the heritability of canopy architecture traits that might serve as useful tools for  
190 hemp breeding and selection.

191 The main objectives of this study were to (1) assess the genetic diversity of hemp, (2) evaluate  
192 common parent families segregating for economically-important traits in the field, (3) develop  
193 novel selection criteria for plant architecture, (4) determine important predictors of final dry  
194 floral biomass yield, and (5) establish an ideotype for field grown cannabinoid hemp.

## 195 **Materials and Methods**

### 196 **DNA isolation, genotyping, and diversity analysis**

197 Leaf tissue from 190 hemp genotypes representing grain, dual-purpose, fiber, and cannabinoid  
198 cultivars, as well as U.S. feral accessions, were obtained from Cornell Hemp seed and clonal  
199 inventories or from breeders or growers (Table S1). Young leaves and shoot-tips were freeze  
200 dried, then ground to a fine powder with a Geno/Grinder<sup>®</sup> (SPEX SamplePrep, Metuchen, NJ),  
201 and genomic DNA was extracted using a DNeasy<sup>®</sup> Plant Mini kit (QIAGEN Inc., Valencia, CA),  
202 following the manufacturers protocol. DNA quality was checked by agarose gel electrophoresis  
203 and quantified with a Qubit<sup>®</sup> fluorometer (Thermo Fisher Scientific, Waltham, MA). Library

204 construction and sequencing was based on the 96-plex genotyping-by-sequencing (GBS)  
205 protocol (Elshire *et al.*, 2011), with ApeKI serving as the restriction enzyme. Targeting 2.5  
206 million reads per sample, 2×150bp libraries were sequenced on the NovaSeq 6000 (Illumina Inc.,  
207 San Diego, CA) platform at the University of Wisconsin Biotechnology Center DNA Sequencing  
208 Core Facility (Madison, WI).

209 Variant discovery was performed using the Tassel GBS Discovery Pipeline version 2 (Bradbury  
210 *et al.*, 2007; Glaubitz *et al.*, 2014). Barcoded reads were aligned to the CBDRx version 2 genome  
211 assembly GCF\_900626175.2 (Grassa *et al.*, 2021) with BWA *mem* (Li and Durbin, 2009). The  
212 mean number of barcoded reads per sample was 2.26 million with a mean alignment of 91%. The  
213 raw vcf, containing 275,828 single nucleotide polymorphisms (SNPs), was filtered with  
214 VCFtools version 0.1.15 (-minDP 7, -minQS 30, -max-missing 0.15, -maf 0.01) (Danecek *et al.*,  
215 2011), resulting in 55,452 SNPs covering all 10 chromosomes, 20 unplaced scaffolds, and the  
216 mitochondrial genome. Mean sample heterozygosity was 17% (range: 6% to 34%) and mean site  
217 missingness was 16% (range: 7% to 27%).

218 A distance matrix, calculated as 1 – pIBS (probability of identity-by-state), was converted to  
219 Newick format to generate an unrooted neighbor-joining tree in Archaeopteryx (Han and  
220 Zmasek, 2009). To infer the number of clusters for discriminant analysis of principal  
221 components (DAPC), variants were converted to genind format in vcfR (Knaus and Grünwald,  
222 2017), which served as input to *find.clusters* (max.n.clust = 19, n.pca = 50, n.start = 10, n.iter =  
223 100, method = ‘kmeans’, stat = ‘BIC’) and *dapc* in adegenet 2.0 (Jombart *et al.*, 2010). Pairwise  
224 fixation index ( $F_{ST}$ ) and allelic richness (rarified allele counts) were estimated for each cluster  
225 using *genet.dist* (method = ‘WC84’) and *allelic.richness*, respectively, in hierfstat (Goudet and  
226 Jombart, 2021).

## 227 **Population development**

228 Genetically diverse female hemp plants were crossed with the high-concentration cannabidiol  
229 female hemp cultivar, ‘TJ’s CBD’ (Stem Holdings Agri, Eugene, OR), to generate 17 common  
230 families and another six families were produced using two inbred  $S_1$  selections of ‘TJ’s CBD’  
231 (Table 1). To ensure all progeny were female, silver thiosulfate (STS) was used to induce  
232 staminate flowers on the pollen parent (Ram and Sett, 1982). Three weekly foliar spray



233 applications of 8 mM STS was sufficient to initiate productive staminate flowers. Crosses were  
234 conducted in separate greenhouses to ensure there was no undesired cross-pollination. Plants  
235 were dried, threshed, seed was cleaned of debris, and stored in a secure, locked freezer ( $-4^{\circ}\text{C}$ ) to  
236 ensure seed longevity.

### 237 **Experimental design**

238 For each family, seeds were sown into deep 50-cell Sureroots trays (T.O. Plastics, Clearwater  
239 MN) with potting mix (LM111, Lambert, Rivière-Ouelle, QC, Canada) in the greenhouse with  
240 supplemental lighting at 16:8 light:dark regimen, three weeks before planting in the field at  
241 Cornell AgriTech (Geneva, NY). The common parent, ‘TJ’s CBD’, was planted from cuttings,  
242 but grown in the same greenhouse conditions as the seedlings. Cuttings were rooted using  
243 Clonex<sup>®</sup> Rooting Gel (Hydrodynamics Intl., Lansing, MI). At the time of planting (June 16,  
244 2020), 15 progeny individuals were randomly selected from each family, and planted together in  
245 single plots at 1.2 m spacing within row and 1.8 m spacing between rows (Fig. S2). Granular  
246 fertilizer (19-19-19, N-P-K) was incorporated at  $95\text{ kg ha}^{-1}$  before raised beds with plastic mulch  
247 were built. Drip irrigation was installed under plastic mulch. Landscape fabric was installed in  
248 aisles to suppress weed pressure. Soil moisture sensors (HOBOnet 10HS, Onset Computer Corp,  
249 Bourne, MA) were randomly installed across the field to aid in timing of irrigation. The field was  
250 fertigated twice through a Dosatron (Dosatron Intl., Inc., Clearwater, FL) four and six weeks  
251 after planting, using Jack's 12-4-16 Hydro FeED RO (J.R. Peters Inc., Allentown, PA).

### 252 **Floral phenology**

253 Flowering date was recorded when pre-terminal (axial flowers with shortening internodes) and  
254 terminal pistils (clusters of flowers at shoot termini) were observed. Weekly observations were  
255 recorded until all plants were terminally flowering, and expressed as days to flower after planting  
256 in the field.

### 257 **Stem growth and architecture measurements**

258 Plant height, measured as the length of the primary stem, was assessed weekly for 10 weeks,  
259 beginning the week after planting in the field. Growth rates were calculated using height  
260 measurements over time. Plant form was derived from plant height, maximum canopy diameter  
261 and height at that diameter at 63 DAP (Table S2; Fig. S3). From these measurements, upper kite

262 hypotenuse to lower kite hypotenuse ratio was calculated, as well as kite perimeter and kite  
263 circularity. Trunk length (ground to first branch) was measured at harvest, and was subtracted  
264 from final height to scale kite area. Internode length was derived from counting the number of  
265 branching pairs along 50 cm of the primary stem in the middle of the canopy. Kite branch angle  
266 was calculated from the lower kite triangle, using the difference of maximum canopy diameter  
267 height and trunk length to scale the hypotenuse.

## 268 **Foliar and physiology measurements**

269 Chlorophyll concentration was measured using an Apogee MC-100 meter (Apogee Instruments  
270 Inc., Logan, UT) at 50 DAP, as an average of three unique measurements on fully-expanded  
271 leaves in the middle canopy, not less than 15 cm from the shoot apex. Leaves at the same  
272 position were sampled from the outer canopy at 86 DAP to measure leaflet number, leaf area,  
273 leaf length, leaf perimeter, petiole area, petiole length, and petiole perimeter. Intact leaves with  
274 petioles were measured in the Fiji distribution of ImageJ (Schindelin *et al.*, 2012) by converting  
275 each leaf scan image to 8-bit binary then manually separating leaf and petiole. For all leaf area  
276 measurements, leaflets were attached to the rachis. Leaf width was not measured because of the  
277 non-uniform placement of leaflets in leaf scans. Alternatively, the maximum width and length of  
278 the middle leaflet was measured, and were used to derive middle leaflet area, calculated as a  
279 pointed oval. Entire leaf area (sum of leaf and petiole) was validated ( $R^2=0.9993$ ) by comparing  
280 manual measurements from ImageJ with automated measurements using *run.ij* (low.size = 0.5,  
281 low.circ = 0) in LeafArea (Katabuchi, 2015). Each leaf and respective petiole were then dried  
282 and weighed to calculate specific leaf area and specific petiole area. Using the same leaf scans,  
283 green leaf index,  $(2G-R-B) / (2G+R+B)$ , was calculated by splitting and masking RGB channels  
284 in imager (Barthelme, 2017) (Fig. S4). Hemp powdery mildew (*Golovinomyces spadicus*)  
285 severity (PM) was visually rated for each plant on a continuous scale of 0-100% canopy leaf area  
286 diseased, measured at 71, 86, and 97 DAP.

## 287 **Biomass measurements**

288 Individuals were harvested when the inflorescence was fully-mature, typically five weeks after  
289 initiation of terminal flowering. Total wet biomass yield was measured for all individuals in the  
290 trial. For each family, a representative individual (34 individuals in total) was harvested and

291 dried to calculate dry biomass yield, then floral material was hand stripped and weighed to  
292 determine floral biomass yield. To account for differences in growth rates attributable to  
293 flowering time variation in segregating families, representative early- and late-flowering  
294 individuals were harvested for dry biomass measurements. The wet biomass of both early and  
295 late flowering samples was strongly correlated with dry biomass ( $r = 0.98$ ) and dry stripped  
296 biomass ( $r = 0.96$ ). The strong linear relationship of wet to dry biomass made accurate prediction  
297 of dry stripped biomass achievable. Utilizing the wet (WBM), dry (DBM), and dry stripped  
298 biomass (DSBM) of the sampled individuals, predictions were obtained with the following  
299 simple linear models:  $DBM = -0.13322 + 0.31174 \times WBM + \varepsilon$ , where  $\varepsilon \sim \mathcal{N}(0, 0.1446^2)$ ;  
300  $DSBM = 0.113884 + 0.156749 \times WBM + \varepsilon$ , where  $\varepsilon \sim \mathcal{N}(0, 0.1031^2)$ . Dry floral biomass per  
301 unit area ( $\text{kg m}^{-2}$ ) was calculated by dividing dry floral biomass by the square of the maximum  
302 canopy diameter.

### 303 **Phenotypic characterization based on RGB and multispectral UAS images**

304 A Matrice 100 series drone equipped with a Zenmuse 3 RGB camera ( $4K 4096 \times 2160$  px) (DJI,  
305 Shenzhen, China) and a MicaSense RedEdge five-band multispectral sensor ( $1280 \times 960$  px)  
306 (MicaSense Inc., Seattle, WA) was flown 10 times during the growing season using the  
307 DroneDeploy App version 2.90.0 (DroneDeploy, Sydney, Australia). Flights were completed at  
308 10 day intervals from 15 DAP to 93 DAP, with an altitude of 20 m and 80% front and side  
309 overlap. Ground sampling distances for the Zenmuse 3 and RedEdge were 0.86 cm/px and 1.39  
310 cm/px, respectively. A data processing pipeline was developed to analyze collected aerial images  
311 for the extraction of morphological and vegetation index traits (Fig. S5). Collected color and  
312 multispectral images were processed using Metashape Pro version 1.6.0 (Agisoft LLC, Russia)  
313 to reconstruct color and multispectral orthoimages and colorized 3-D point clouds. Ground  
314 control points were manually surveyed using a real time kinematic Trimble R8s GPS (Trimble  
315 Inc., Sunnyvale, CA), and used to georectify the reconstructed data in the universal transverse  
316 mercator coordinate system for successive analyses.

317 Plant geo-locations were calculated using color orthoimages. A color orthoimage was converted  
318 to an excessive green index (Woebbecke *et al.*, 1995) map then binarized using the Otsu method  
319 (Otsu, 1979). Connected component labeling was used to segment individual plants and calculate  
320 their center locations. Based on plant centers, bounding boxes of 1.83 m (across row) and 1.22 m

321 (within row) were generated for the localization and segmentation of plants in point clouds and  
322 multispectral orthoimages. A significant shift of plant centers was observed between 23 and 34  
323 DAP, so the plant geo-locations and bounding boxes were derived from the color orthoimages on  
324 the two days, respectively. The locations and bounding boxes calculated on 23 DAP were used to  
325 analyze the data collected on 23 DAP, and those calculated on 34 DAP were used for the rest of  
326 data.

327 In the colorized point clouds, the point cloud of each plant was cropped using the calculated  
328 bounding boxes. Random sample consensus (Fischler and Bolles, 1981) was used to identify the  
329 ground plane in the plant point cloud (red points in Fig. S5) and separate canopy points (green  
330 points in Fig. S5) for the extraction of canopy morphological traits: height, projected area, and  
331 volume. In the multispectral orthoimages, a circular region with a radius of 0.28 m was defined  
332 at each plant center, and seven vegetation indices were calculated using pixels within the region  
333 for a corresponding plant. The seven vegetation indices include normalized difference vegetation  
334 index (NDVI) (Rouse *et al.*, 1973), enhanced vegetation index (EVI) (Huete *et al.*, 2002), green  
335 chlorophyll index (GCI) (Gitelson *et al.*, 2003), green normalized difference vegetation index  
336 (GNDVI) (Gitelson *et al.*, 1998), modified non-linear index (MNLI) (Yang *et al.*, 2008),  
337 modified soil adjusted vegetation index 2 (MSAVI2) (Qi *et al.*, 1994), and optimized soil  
338 adjusted vegetation index (OSAVI) (Rondeau *et al.*, 1996). Equations for physiological indices  
339 are in Table S2.

#### 340 **Cannabinoid analysis**

341 The primary terminal inflorescence (10 cm) was sampled from each individual in the week  
342 preceding harvest for cannabinoid analysis, and dried in a climate-controlled room with a  
343 maximum temperature of 30°C and average relative humidity of 35%. Once dried, samples were  
344 milled to a fine powder for cannabinoid analysis via HPLC, further described in Stack *et al.*  
345 (2021). To control for potential variation in decarboxylation of acid-form cannabinoids,  
346 statistical analyses were based on total potential cannabinoid percentages by mathematically  
347 combining the concentrations of the acid and neutral form as described in Stack *et al.* (2021).

#### 348 **Statistical analysis**

349 All plotting and statistical analyses were conducted in the open-source statistical computing  
350 platform R version 3.4.2 (R Core Team, 2017). Following ANOVA, mean separation was  
351 conducted using Tukey's HSD in *agricolae* (Mendiburu, 2017). Wilcoxon Rank Sum test was  
352 used for paired comparisons with *wilcox.test* (conf = 0.95). Tests for pairwise associations ( $p <$   
353 0.001) were conducted using Pearson's correlation coefficient ( $r$ ) with *cor.test*. Model II linear  
354 regression was conducted using the ranged major axis (RMA) method in *lmodel2* (Legendre,  
355 2014). Maximum growth rates were modelled with *all\_splines* (spar = 0.35, optgrid = 50) from  
356 the log-linear part of the growth curve in *growthrates* (Petzoldt, 2007). Absolute area under the  
357 disease pressure curve (AUDPC) was calculated from three PM ratings, using the *audpc* function  
358 in *agricolae*. Archetypal analysis of plant architecture was performed with *stepArchetypes* ( $k =$   
359 1:10, nrep = 5) in *archetypes* (Eugster and Leish, 2009), using the two ratios as input variables:  
360 maximum canopy diameter to plot height and maximum canopy diameter height to plot height.  
361 Heritability was calculated as the ratio of additive genetic variance to total phenotypic variance.  
362 For half-sib families, additive genetic variance was estimated as four times the family variance  
363 ( $\sigma^2_A = 4\sigma^2_F$ ) and phenotypic variance as the sum of family and residual variance. Variance  
364 components were estimated using *lmer* in *lme4* (Bates *et al.*, 2015). Variable selection via  
365 stepwise regression was performed with *stepAIC* (direction = 'both'). Relative importance  
366 metrics for multiple linear regression was performed to order predictors and decompose  $R^2$  in  
367 *relaimpo* (Grömping, 2006), using 1000 bootstrap replicates (Bonferonni CI = 95%). LMG  
368 indices (Lindeman *et al.*, 1980) were used to partition additive properties of  $R^2$ , calculated as the  
369 sum of their individual importance, irrespective of the correlation among predictor variables.

## 370 **Results and Discussion**

371 The relationships between architecture, foliar, physiological, and pathology traits, and HTP  
372 measurements were assessed to provide a clearer picture of hemp growth and development, and  
373 to understand their contribution to the traits of primary economic importance: floral biomass and  
374 cannabinoid yield. These were assessed in families with a common parent to reveal the degree of  
375 segregation based on parent heterozygosity and allelic diversity.

## 376 **Genetic diversity of hemp**

377 Parent selection for this study was predicated on the genetic relatedness of a broad sample of  
378 available hemp germplasm using high-density SNP markers (Table S1), of which seed parents  
379 from all cannabinoid hemp clades are fully representative (Fig. 1A). Of the seven primary  
380 clusters identified, genotypes grouped by market class (grain, fiber, cannabinoid), geographical  
381 origin, and/or a common founder (Fig. 1B; Fig. 1C). For instance, grain, Italian fiber and U.S.  
382 feral, and Chinese genotypes were represented by distinct clusters. Cannabinoid hemp genotypes  
383 clustered by common founder populations and were the most admixed; however, cannabinoid  
384 genotypes in group 1 (T1/R4) were particularly distinct, with no clear evidence of admixture  
385 (Fig. 1D). There was clear population differentiation, with pairwise  $F_{ST}$  ranging from 0.08  
386 (grain/dual and fiber/feral) to 0.30 (grain/dual and T1/R4) (Fig. 1E), reflecting the spatial  
387 separation of DAPC clusters in Fig. 1B. Increased allelic richness was observed at the end of  
388 chromosome 4 for the fiber/feral cluster (Fig. S1), and all four cannabinoid clusters had lower  
389 allelic richness along chromosome 7, probably due to repeated selection on cannabinoid synthase  
390 cassettes residing therein (Grassa *et al.*, 2021).

391 Hybrid development in hemp will depend on genome-wide markers to infer kinship and heterotic  
392 group membership. Prediction of combining ability is the hallmark of hybrid breeding, however,  
393 a deficiency of published studies on hemp hybrids and the lack of a unified genotyping platform  
394 has delayed its progress in the research community. Nevertheless, the clusters identified here  
395 serve as a good starting point for hemp breeders to select representative inbred parent lines for  
396 early analysis of combining ability and stable hybrid deployment.

### 397 **Floral phenology is quantitative with major effect genes**

398 There was substantial variation in flowering time both within and among families (Fig. 2A).  
399 Seven families segregated for early, mid, and late terminal flowering day, of which earlier  
400 flowering individuals were far less variable compared to those flowering later. The mean number  
401 of days to pre-terminal and terminal flowering was 59.3 DAP (range: 28 to 85 DAP) and 68.9  
402 DAP (range: 35 to 92 DAP), respectively. The common parent clone, 'TJ's CBD', initiated  
403 flowers at 63 DAP and terminal flowering at 70 DAP, and did not vary across replicate plots.  
404 While floral phenology in *C. sativa* is quantitative (Salentijn *et al.*, 2019), there may be few  
405 genes conferring the early flowering trait observed in this population. Based on the segregation  
406 of the  $S_2$  families, the considerable within-family variation in days to flower was due to the



407 common parent being heterozygous for at least one gene of major effect in the flowering time  
408 pathway. For instance, S<sub>2</sub> family 19-1206 initiated flowering at 42 DAP, whereas, in S<sub>2</sub> family  
409 19-1205, eight progeny initiated at 42 DAP and seven after 63 DAP. Family 20-1001, which had  
410 the same S<sub>1</sub> pollen parent as S<sub>2</sub> family 19-1206, flowered the earliest at 35 DAP. In addition, the  
411 seed parent of 20-1001 ‘Candida’ was also crossed with the original heterozygous common  
412 parent (family 19-1177), with five terminally flowering ~35 DAP and 10 ~85 DAP.

413 For those families not clearly segregating for flowering date, the presumably dominant seed  
414 parent allele(s) masked that of the common parent in the hybrid. If this was a simple recessive  
415 trait, S<sub>1</sub> progeny would segregate 3 late : 1 early, and depending on the status of the S<sub>1</sub> parent, S<sub>2</sub>  
416 lines would be either all-early, all-late, or segregating. However, 3:1 ratios were not clearly  
417 observed, but were either ~1:1, ~2:1, all-early, or all-late. If 1:1 ratios could be explained as a  
418 testcross, then homozygous recessive seed parents would express the early flowering trait, yet  
419 only ‘Candida’ and ‘TJ’s CBD S<sub>1</sub> #5’ flowered early. It is probable that more than one gene is  
420 controlling the early flowering trait observed in this population, and may be evidence of  
421 epistasis. Since the seed parents were genetically diverse, there are likely to be multiple  
422 segregation models for this trait. Although some ratios could be explained by a single factor and  
423 others, two or more, larger populations would undoubtedly be required to test these hypotheses.  
424 Inbred lines can be developed that will be homozygous for those major gene alleles affecting  
425 flowering time, but it will be critical to understand how different alleles interact in the  
426 heterozygous state in F<sub>1</sub> hybrid cultivars to determine latitudinal adaptation.

#### 427 **Foliar allometry**

428 Leaf morphology traits are routinely used to designate plants as *C. sativa* (narrow leaflets), *C.*  
429 *indica* (broad leaflets), *C. ruderalis* (three leaflets to a leaf), or hybrids and/or “percentages” of  
430 each (Clarke and Merlin, 2013), albeit weakly justified (Vergara *et al.*, 2021). Here, fully-  
431 expanded leaves were collected from each individual at the same approximate location,  
432 irrespective of terminal flowering day. All three general leaf types could be observed on  
433 individual genotypes. These observations can be attributed to ontogenetic heterophylly,  
434 notwithstanding confounding factors like variation in floral phenology and canopy light  
435 penetration. There was a strong positive correlation of terminal flowering day and leaflet number  
436 ( $r = 0.67$ ) (Fig. 2B), of which three primary groups of individuals had a common terminal

437 flowering day, and mean leaflet number increased with these groups: <50 DAP ( $3.9 \pm 0.14$ ), 50-70  
438 DAP ( $5.3 \pm 0.09$ ), and >70 DAP ( $6.3 \pm 0.09$ ). Since early flowering individuals formed  
439 inflorescences at shoot apices early on, it is possible that differential levels of a growth hormone,  
440 such as ethylene, may have had an effect on leaf development and morphology, compared to  
441 those flowering later.

442 The mean leaf and petiole area for families with seed parents inferred to be in T1/R4 diversity  
443 group 1 (Table 1) were 37% to 54% and 34% to 82% greater than mean values of all other  
444 family groups, respectively. With a population mean of  $7.8 \text{ cm}^2 \text{ leaflet}^{-1}$ , families 19-1162, 19-  
445 1170, and 19-1197 (all in: T1/R4 diversity group 1) had the greatest mean leaflet area ( $>10.2$   
446  $\text{cm}^2$ ), whereas families with the lowest mean leaflet area were 20-1072 and 19-1153 ( $<4.9 \text{ cm}^2$ ),  
447 both of which shared the common seed parent ‘A2R4’ (all in: Fiber/Feral diversity group 5). In  
448 general, families with a Fiber/Feral seed parent background had smaller leaves and petioles, and  
449 those with a T1/R4 background were most always larger.

450 Larger plants were apt to have a lower leafing intensity ( $r = -0.82$ ), which is defined as the ratio  
451 of the number of leaves to stem volume. It is thought that smaller leaves of land plants are found  
452 on species that produce more of them, such that variation in leaf size can be predicted in terms of  
453 a leaf mass/number trade-off. Kleiman and Aarssen (2007) found that in the new growth of  
454 deciduous trees, the slope of  $\log(\text{leafing intensity})$  and  $\log(\text{leaf mass})$ , does not significantly  
455 deviate from  $-1$ . They posit that selection may favor high leaf intensity, with small leaf mass  
456 resulting not as direct adaptation, but simply as a trade-off. Here, the slope of the regression of  
457  $\log$ -transformed leafing intensity and leaf mass ( $R^2 = 0.66$ ) was  $-0.71$  (Fig. 3A), indicating that  
458 for every 1% increase in leafing intensity, there was a 0.71% decrease in individual leaf mass.  
459 Although the obvious difference here is that *C. sativa* is an herbaceous annual, calculation of  
460 total leaf number in this study included the inflorescence, which is substantial in cannabinoid  
461 cultivars. Further, cannabinoids can account for more than 20% of the dry mass of the  
462 inflorescence in mature plants, so it is very likely that the comparative decrease in individual leaf  
463 mass is an underestimate compared to that of sampled mid-season growth.

464 In addition, there was a strong positive relationship between leafing intensity and specific petiole  
465 area ( $R^2 = 0.55$ , slope = 2.08), but not specific leaf area ( $p = 0.97$ ) (Fig. 3B). Theoretically,  
466 specific leaf area should scale linearly with growth rate (Liu *et al.*, 2021), but was not evident in



467 this dataset ( $p = 0.62$ ). Specific petiole area was inversely correlated with biomass accumulation  
468 ( $r = -0.51$ ), stem volume ( $r = -0.49$ ), and kite area ( $r = -0.48$ ). While most leaf, stem, and  
469 physiological traits had inverse relationships with specific petiole area, petiole circularity ( $r =$   
470  $0.23$ ), leaf circularity ( $r = 0.57$ ), and mid-canopy branch number ( $r = 0.44$ ) were positively  
471 associated with the trait. An increase in specific petiole area was associated with a decrease in  
472 leaf perimeter ( $r = -0.77$ ). Further, the slope of the regression of  $\log$  (specific petiole area) and  
473  $\log$  (leaf perimeter) was  $-1.46$  ( $R^2 = 0.59$ ), which suggests an allometric relationship (Fig. 3C).  
474 Similar results were found for specific petiole area and leaflet number ( $R^2 = 0.52$ , slope =  $-0.9$ ),  
475 such that plants with few leaflets per leaf had less mass per unit area and lower leaf perimeter.  
476 However, the slope of the regression of  $\log$  (specific petiole area) and  $\log$  (leaf dry weight) was  
477  $-2.1$  ( $R^2 = 0.56$ ), whereby a small increase in petiole mass per area accompanied a  
478 disproportionate increase in leaf dry mass (Fig. 3D).

#### 479 **Plant growth is most influenced by floral phenology**

480 Within-family variation in growth rate and biomass accumulation are intrinsically linked to  
481 variation in floral phenology. Overall, day of maximum stem growth was positively correlated  
482 with days to flower ( $r = 0.45$ ) (Fig. 2C); however, the growth rate of all individuals did not  
483 immediately diminish following floral initiation. Families such as 19-1153, developed clusters of  
484 flowers at shoot axes and apices early in the growing season but did not begin to form compact  
485 inflorescences until weeks later. This family was also the tallest (2.05 m) and had the fastest  
486 mean growth rate ( $2.75 \text{ cm day}^{-1}$ ) of all other families (Table S3). Not significantly different  
487 from one another, inbred  $S_2$  families, 19-1205 and 19-1206, had the slowest mean growth rates  
488 of  $1.46$  and  $1.03 \text{ cm day}^{-1}$ , respectively. Furthermore, families with greater variances for final  
489 height (70 DAP) were also those segregating for early and later flowering dates.

#### 490 **Kite variables are good indicators of within-family variance in canopy architecture**

491 Kite variables produced a useful model that accurately portrays the major architectural  
492 differences in hemp. In high-density plantings of fiber and grain hemp, apical dominance is  
493 markedly stronger, and leads to a far more columnar habit that maintains dormancy of axial  
494 buds, which often results in a significant reduction of branching. The wide planting density in  
495 this study was chosen to maximize light availability so that the variation in architectural traits

496 would be more easily discernable. The common parent to the F<sub>1</sub> families in this study has a  
497 somewhat irregular, excurrent habit, which may be due to the fact that it was propagated from  
498 cuttings. Of all the individuals surveyed, not one lacked opposite decussate branching leading to  
499 sub-opposite branching at shoot apices and lateral spirals on branches.

500 Plant size (kite area) (Fig. 4A) and form were derived from three measurements (plant height,  
501 maximum canopy diameter, and the height at that diameter) and used to construct 2-D kite  
502 models, of which there was significant variation within and among families (Fig. 4B; Table S3).  
503 These values also displayed high heritability values, suggesting that selection will lead to genetic  
504 gains (Table 2). These kite models can be used to evaluate the segregation of plant size and form  
505 within and among populations. While there was considerable variance within some families for  
506 kite area, others were quite uniform, reflecting the low-level of heterozygosity for those seed  
507 parents. Based on archetype analysis, four primary groups (extremes) were established (Fig. 4C),  
508 each varying in kite hypotenuse ratio and/or the ratio of maximum canopy diameter to height.  
509 One form that was not observed in this study was a strongly prostrate habit (canopy diameter »  
510 height), although such an archetype would be far less economically valuable for the grower. It  
511 would be useful to understand how canopy architecture variables are altered by archetype when  
512 planted at varying densities, especially with respect to cultivar-specific suitability and  
513 environmental plasticity.

514 The least variable architectural trait, kite circularity, had an F<sub>1</sub> mean of 0.76 (CV = 0.03) and  
515 common parent mean of 0.77. Kite circularity decreases when branch angles are either less or  
516 greater than 45°, which results in a more columnar or prostrate branching habit, respectively  
517 (Fig. 4D). While there was no significant association with kite circularity and dry floral biomass  
518 yield on a per plant basis ( $p = 0.4$ ), selection of high-yielding individuals with low branch angles  
519 and low kite circularity would permit denser plantings without sacrificing axial branches to  
520 competition, and result in greater yield per acre. For instance, if dry stripped floral biomass yield  
521 is considered per unit area ( $\text{kg m}^{-2}$ ), both circularity ( $r = -0.27$ ,  $p < 0.001$ ) and branch angle ( $r =$   
522  $-0.28$ ,  $p < 0.001$ ) become redeemable selection criteria.

523 Since low specific kite area ( $\text{m}^2 \text{kg}^{-1}$ ) is indicative of small plants with a high dry biomass  
524 proportion, and vice versa, this measurement can generally be used to infer canopy density.  
525 Theoretically, wet leaf mass fraction divided by kite volume is a more pure estimate of canopy

526 density ( $\text{kg m}^{-3}$ ), and can be derived allometrically (Table S2). Canopy density was most  
527 positively correlated with the number of mid-canopy branches ( $r = 0.70$ ), leaf circularity ( $r =$   
528  $0.43$ ), and specific petiole area ( $r = 0.35$ ), and inversely with final height ( $r = -0.82$ ). The family  
529 with the greatest canopy leaf density was the inbred, early-flowering  $S_2$  family 19-1206. Notably,  
530 the largest plants were not necessarily the most productive per unit area and dense canopies can  
531 come with significant costs, such as greater incidence of disease. Genetic selection on canopy  
532 architecture and canopy density traits described here could dramatically reduce grower inputs  
533 associated with pruning and maintenance, which has been shown to increase uniformity of  
534 cannabinoid profile in greenhouse grown, drug-type *C. sativa* (Danziger and Bernstein, 2021).

535 Incidents of broken branches all occurred at collars along the main stem and were caused by  
536 lateral movement from strong winds. Many broken branches continued to support foliage and  
537 inflorescences after breakage but were less vigorous. Plants with greater kite area and longer  
538 internodes were more prone to breakage, especially if branching angles were shallow. Inbred  $S_1$   
539 families showed no signs of broken branches throughout the trial, due to both their small stature  
540 and shortest mean internode length (4.1 cm). However,  $S_2$  family 19-1206 had the greatest mean  
541 branching angle ( $48.7^\circ$ ), which suggests that plant size (kite area) plays a more important role in  
542 maintaining branch and internode lengths, which scale linearly. Besides broken branches, there  
543 were only two instances of complete lodging, each derived from the seed parent ‘A2R4’, and  
544 were significantly taller ( $>2$  m) overall.

#### 545 **Basal stem diameter is the best single predictor of biomass yield**

546 Ordinary least square and model type II regression protocols indicate that most of the principal  
547 morphometric variables of interest, e.g., plant height, leaf size, and canopy spread, are  
548 significantly correlated ( $r > 0.65$ ,  $p < 0.005$ ) with basal stem diameter (Fig. S7). These findings  
549 resonate with scaling relationships reported for interspecific comparisons (Enquist and Niklas,  
550 2002). For example, plant height, on average, scales as the 0.65-power of basal stem diameter.  
551 The numerical value of this scaling exponent is consistent with elastic self-similarity, i.e., plant  
552 height scales as the  $2/3$ -power function of stem diameter (Niklas, 1995). In summary, most of the  
553 morphometric variables of interest are correlated with basal stem diameter (across phenotypes)  
554 and most of these variables scale with respect to one another in a manner that is consistent with  
555 scaling relationships reported for vascular plants with self-supporting stems.

556 Of all traits measured, basal stem diameter offers the best return on investment as a selection  
557 criteria for biomass yield. Regression of log (biomass) and log (stem diameter) resulted in a  
558 slope of 1.7 ( $R^2 = 0.78$ ), whereby incremental gains in stem diameter equate to considerable  
559 gains in biomass yield (Fig. 4E). Together with height, primary stem volume can be estimated,  
560 which is also strongly associated with biomass yield ( $R^2 = 0.82$ , slope = 0.64), but the slope of  
561 the regression reiterates that stem diameter alone is a superior selection criterion. It would be  
562 interesting to determine the earliest point at which stem diameter measurements are predictive of  
563 biomass yield, as such information could be used in early seedling selection of breeding  
564 populations.

### 565 **Early HTP measurements are well-correlated with field phenotypes**

566 There were dramatic differences in morphological HTP aerial measurements (canopy height,  
567 area, and volume) between flights flown before and after 56 DAP, with good correlations among  
568 measurements within but not among earlier and later flights. These differences were due to a  
569 strong wind storm between 50 DAP and 56 DAP that resulted in moderate lodging and stem  
570 breakage. Even though  $F_1$  families were planted in rows, a family-level analysis did not have a  
571 major effect on HTP to field phenotypic correlations of later flights (Fig. S6). Canopy height and  
572 volume obtained from orthomosaic mesh layers were well-correlated with corresponding field-  
573 collected phenotypes plot height ( $r = 0.83$ ) and kite volume ( $r = 0.67$ ) for early flights. Family-  
574 level correlations were even stronger for height ( $r = 0.95$ ) (Fig. 5A) and volume ( $r = 0.80$ ) (Fig.  
575 5B). Biomass yield was most associated with canopy volume (35 DAP) ( $r = 0.56$ ), yet this  
576 correlation was only marginally improved on a family mean basis (Fig. 5C), and for all aerial  
577 surveys beyond 50 DAP, there were only weak correlations between the two.

578 Instances of lodging did not affect vigor or productivity but confounded the accuracy of  
579 morphological indices after 56 DAP because of alterations in the primary axis and projected area  
580 of individual plots. Physiological indices were likewise affected, but not as profoundly as the  
581 morphological indices (Fig S7). There were good phenotypic correlations with nearly all HTP  
582 measurements but EVI, which was not informative. Notably, we observed that few cannabinoids  
583 were associated with physiological indices (Fig. S8). The strongest were in the abundance of the  
584 minor cannabinoids CBL ( $r = -0.35$ ) and CBDV ( $r = -0.17$ ) with MNLI, MSAVI2, and OSAVI  
585 indices at 93 DAP, but those with CBDV may due to population structure, since only two

586 families had individuals with >1% CBDV content. It may be possible to predict cannabinoid  
587 profiles and yield using multispectral or hyperspectral data, similar to what has been attempted  
588 with FT-NIR (Callado *et al.*, 2018), but concerted segmentation of inflorescences would be  
589 required to develop an effective strategy to better estimate these profiles from aerial imaging.  
590 Further analyses of denser, direct-seeded plantings would both reduce incidence of lodging and  
591 offer better estimates compared to the larger plot spacing provided in this trial.

## 592 **Powdery mildew susceptibility is multigenic and affects biomass yield and quality**

593 Biotic and abiotic factors can influence hemp yield, uniformity, and stability (Thiessen *et al.*,  
594 2020). One of the most significant diseases of hemp in the northeastern US, hemp powdery  
595 mildew (PM) is caused by the obligate biotrophic fungal pathogen *Golovinomyces spadicus*  
596 (Szarka *et al.*, 2019; Weldon *et al.*, 2019), and can lead to early leaf drop and reduced  
597 inflorescence quality (Punja *et al.*, 2019; Stack *et al.*, 2021). Management options are available  
598 but few synthetic chemicals have been approved for field grown hemp (Punja and Scott, 2020),  
599 and genetic sources of durable resistance to PM have not been established. ‘FL 58’ (Sunrise  
600 Genetics, LLC), seed parent of family 19-1166, was previously characterized as having the  
601 lowest susceptibility to PM in multi-environment cultivar trials (Stack *et al.*, 2021). In this  
602 current study, family 19-1166 displayed varying signs of PM throughout the growing season,  
603 which suggests that resistance is multigenic and/or recessive, heterozygous in the common  
604 parent background. Although there was substantial variation in PM disease progression  
605 (AUDPC) (CV = 0.55), the inherent link between floral phenology and disease incidence (i.e.,  
606 early flowering plants tend to be more diseased), can make phenotypic selections for genetic  
607 resistance difficult.

608 Powdery mildew severity at 97 DAP ranged from 0 to 95% with a mean of 37.9% (CV = 0.52).  
609 Families with the greatest mean AUDPC were those crossed with an inbred selection of the  
610 common parent and/or derived from a selection of ‘Candida’, a highly-susceptible cultivar. The  
611 lowest mean AUDPC were for families 19-1169 and 19-1154, which were derived from a  
612 selection of ‘Otto II’, a known late-flowering cultivar. AUDPC was positively correlated with  
613 specific petiole area ( $r = 0.43$ ) and inversely with days to flower ( $r = -0.54$ ), green leaf index ( $r =$   
614  $-0.55$ ), MNLI ( $r = -0.48$ ) (Fig. 5D), and biomass yield ( $r = -0.38$ ). Based on these associations,  
615 prolonged exposure of early flowering individuals to PM led to the loss of photosynthetic

616 capacity and early desiccation of leaves and flowers, likely reducing biomass accumulation.  
617 Further, these results suggest that resistance to PM is quantitative and may be confounded by  
618 floral phenology. While later flowering individuals were less susceptible, the late flowering  
619 phenotype is generally not leveraged in the northeastern US because of seasonal constraints at  
620 harvest. In addition, inflorescences may not fully mature before seasonally cold temperatures,  
621 which invariably leads to yield loss. Therefore, durable genetic resistance to PM must first be  
622 identified and introgressed into elite germplasm to reduce grower inputs and maximize yield and  
623 quality traits. Selection for pest and disease resistance is still in its infancy but will likely be a  
624 key component in hemp breeding programs.

### 625 **Variation in cannabinoid profiles**

626 Considering that all individuals in this study were derived from a common parent, cannabinoid  
627 profiles were diverse and varied substantially within and among families (Table 2; Table S3).  
628 Cannabinoid profile and ratios largely followed chemotype described in Toth *et al.* (2020), but in  
629 some families, there were significant deviations in the predicted proportions of minor  
630 cannabinoids, such as CBC (range: 0.05 to 0.1) and CBDV (range: 0.2 to 0.4). Genetic selection  
631 for novel cannabinoid profiles will require further research using segregating populations in  
632 order to identify linked or causal genetic factors (e.g., synthase copy number variation or allele-  
633 specific expression), which will aid marker development and marker-assisted selection efforts.

634 Of all morphological, physiological, and pathological traits measured, few were associated with  
635 cannabinoid profile (Fig. S7; Fig. S8). The strongest associations were with cannabinoid profile  
636 or chemotype (de Meijer *et al.*, 2003) and foliar traits. The seed parent, ‘R4’, part of the lineage  
637 of five families, has dark, rugose, deeply serrated broad leaves and is the source of most B<sub>T</sub>  
638 alleles in the trial (Table S3). In a greenhouse study, Jin *et al.* (2021) reported numerous  
639 morphological traits correlated with chemotype, however, of the chemotype I and II cultivars  
640 assayed, all were from the supposed “indica” (broadleaf) group. Conversely, Vergara *et al.*  
641 (2021) found that taxonomic designation based on leaf morphology in a segregating fiber-type  
642 (narrowleaf “sativa”) × drug-type (broadleaf “indica”) population did not correspond to  
643 cannabinoid profile, which is corroborated here. Unremarkably, significant correlations of  
644 morphological traits with chemotype reported both here and in Jin *et al.* (2021) were simply a  
645 statistical artifact – a result of population dynamics, rather than true biological relevance.



## 646 **Floral biomass yield can be predicted with few key measurements**

647 There are key phenotypes that can be measured early in hemp development that explain a  
648 sizeable portion of the variation in biomass yield. From multiple regression, just the three  
649 variables: stem diameter, kite area, and height accounted for 67% of the explainable variation in  
650 floral biomass yield, of which 87.4% could be fully accounted for by informative predictors  
651 (Table S4). Foliar, phenology, physiology, and PM traits explained far less of the variation in  
652 biomass yield compared to stem growth and architecture, but the contribution of petiole and leaf  
653 traits to biomass yield was still significant.

654 The strong linear relationship of wet to sampled dry biomass ( $R^2 = 0.96$ ) in this study allowed  
655 for the accurate prediction of the former. On average, dry biomass was 30% of wet biomass and  
656 dry stripped floral biomass was 60% of dry biomass, such that ideally, at harvest, 1 kg wet  
657 biomass should yield approximately 0.18 kg dry stripped floral biomass (Table 2). Total  
658 cannabinoid yield (dry stripped floral biomass  $\times$  total cannabinoid proportion) is the primary  
659 economic concern of both growers and processors. We identified four families with mean total  
660 cannabinoid yields that were significantly greater than that of the common parent: 19-1178, 19-  
661 1166, 19-1177, and 19-1162, all exceeding  $150 \text{ g plant}^{-1}$  (Fig. 6A; Table S3). The seed parents of  
662 these four high-performing families were from diversity groups 1 (T1/R4) or 2 (Cherry). It  
663 should be noted that the estimates reported for total cannabinoid yield are somewhat inflated  
664 because tissue samples from shoot apices for cannabinoid content results in an overall greater dry  
665 weight proportion compared to a random sample taken from whole plant floral biomass.

666 Compared to large, high-yielding plants, smaller plants with a greater dry stripped floral biomass  
667 to wet biomass ratio could be planted at higher densities, making harvest and processing more  
668 practical on a larger scale. Although the  $S_2$  families had the lowest mean biomass yield and kite  
669 area, they also had the top mean dry stripped to wet biomass ratio of 0.21, whereas the mean  
670 ratio of all other families was 0.18. Conversely, family 19-1174 was both the largest in size and  
671 highest yielding, but had a mean dry stripped to wet biomass ratio of 0.16. This ratio is inversely  
672 correlated with kite area ( $r = -0.72$ ), height ( $r = -0.70$ ), and growth rate ( $r = -0.67$ ), and  
673 exemplifies agronomic considerations that still need to be met. Questions concerning the harvest  
674 index of hemp and its theoretical maximum are of obvious agronomic importance. Maximizing  
675 dry stripped floral biomass yield per unit area ( $\text{kg m}^{-2}$ ) does not necessarily favor small, early

676 flowering cultivars, even though their dry stripped to wet biomass ratio is superior to those  
677 flowering later. In fact, when dry floral biomass is considered on the basis of yield per unit area,  
678 the correlation of days to flower and yield is virtually negligible ( $r = 0.18$ ) (Fig. 6C) compared to  
679 yield per plant ( $r = 0.68$ ) (Fig. 6B). Simply put, earlier flowering plants are invariably smaller but  
680 are not necessarily less space efficient. However, if early or day neutral plants are direct-seeded,  
681 they may not outcompete weeds because early flowering results in diminished growth rate and  
682 shorter height. We propose that fast growing columnar plants represent an ideotype closer to the  
683 theoretical maximum. Importantly, the use of a cultivar-specific architectural model outlined  
684 here can inform effective field design and planting density to maximize final biomass yield of  
685 hemp and will be a valuable tool for breeders and growers alike.

## 686 **Supplementary Data**

687 Supplementary data are available at *JXB* online.

688 Supplementary Tables S1-S4 can be found in “Carlson et al\_Supplementary Tables.xlsx”.

689 Supplementary Figures S1-S9 in can be found in “Carlson et al\_Supplementary Figures.pdf”.

690 **Table S1.** Genotyping-by-sequencing sample metadata and cluster membership probabilities.

691 **Table S2.** Formulas for architectural traits.

692 **Table S3.** Family means, Tukey HSD groupings, and common parent deviations for all traits.

693 **Table S4.** Analysis of variance from stepwise selection and relative importance of predictors for  
694 final biomass yield.

695 **Fig. S1.** Genetic diversity of hemp cultivars, crosses, and U.S. feral accessions.

696 **Fig. S2.** Field design.

697 **Fig. S3.** Diagram of architectural traits within 2-D kite.

698 **Fig. S4.** Example of calculation of mean GLI by masking operations.

699 **Fig. S5.** Data processing pipeline for the extraction of phenotypic traits from RGB and  
700 multispectral data.



701 **Fig. S6.** Pairwise correlations of field collected traits with aerial morphological indices on a plot-  
702 level and family-level basis.

703 **Fig. S7.** Pairwise correlations of field collected traits.

704 **Fig. S8.** Pairwise correlations of cannabinoid profiles and aerial indices over time.

705 **Dataset S1.** Cannabinoid dataset.

706 **Dataset S2.** Morphological dataset.

707 **Dataset S3.** THCAS dataset.

708 **Dataset S4.** UAS dataset.

709 **Dataset S5.** Phylogenetic dataset.

## 710 **Acknowledgements**

711 We thank Dr. Bill Miller (Cornell University) for assistance with formulation of silver  
712 thiosulfate, as well as Adam Berk (Stem Holdings Agri), Dr. C.J. Schwartz (Sunrise Genetics,  
713 LLC), Joseph Calderone (Emplantx, Inc.), and Edgar Winter (WinterFox Farm) for generously  
714 providing germplasm. We also thank Lauren Carlson, Allison DeSario, Deanna Gentner,  
715 Savanna Shelnett, and Teagan Zingg, for their technical assistance, and Dr. Eric Fabio for  
716 piloting the drone.

717 This work was supported by the New York State Department of Agriculture and Markets through  
718 a grant (AC477) from Empire State Development, by a Federal Capacity Funds grant from  
719 United States Department of Agriculture National Institute for Food and Agriculture, and by a  
720 sponsored research agreement with Pyxus International. Bircan Taskiran was supported by a  
721 TUBITAK Fellowship.

## 722 **Author Contributions**

723 CHC devised the experiment, collected data, performed statistical analysis, and wrote the  
724 manuscript, GMS, YJ, BT, ARC, JT, and GP contributed to data collection. CDS, JKCR, and  
725 LBS secured research funding, provided overall project design, and managed research personnel  
726 and project execution.

727 **Data Availability**

728 The data that support the findings of this study are available within the paper and supplementary  
729 materials published online, and openly available in GitHub at:

730 [https://www.github.com/cornellhemp/Carlson\\_2021\\_Morphometrics/](https://www.github.com/cornellhemp/Carlson_2021_Morphometrics/)

## References

- Andre CM, Hausman J-F, Guerriero G.** 2016. *Cannabis sativa*: The plant of the thousand and one molecules. *Frontiers in Plant Science* 7, 19.
- Barthelme S.** 2017. imager: Image processing library based on 'CImg'. R package version 0.40.2. <https://CRAN.R-project.org/package=imager> Accessed January 2021.
- Bates D, Mächler M, Bolker B, Walker S.** 2015. Fitting linear mixed-models using lme4. *Journal of Statistical Software* 67, 1-48.
- Bradbury PJ, Zhang Z, Kroon DE, Casstevens TM, Ramdoss Y, Buckler ES.** 2007. TASSEL: Software for association mapping of complex traits in diverse samples. *Bioinformatics* 23, 2633-2635.
- Callado C S-C, Núñez-Sánchez N, Casano S, Ferreiro-Vera.** 2018. The potential of near infrared spectroscopy to estimate the content of cannabinoids in *Cannabis sativa* L.: A comparative study. *Talanta* 190, 147-157.
- Clark RC, Merlin MD.** 2013. *Cannabis*: Evolution and ethnobotany. Berkeley: University of California Press.
- Clark RC, Merlin MD.** 2016. *Cannabis* domestication, breeding history, present-day genetic diversity and future prospects. *Critical Reviews in Plant Sciences* 35, 293-327.
- Danecek P, Auton A, Abecasis G, et al.** 2011. The variant call format and VCFtools. *Bioinformatics* 27, 2156-2158.
- Danziger N, Bernstein N.** 2021. Plant architecture manipulation increases cannabinoid standardization in 'drug-type' medical cannabis. *Industrial Crops and Products* 167, 113528.
- de Meijer EPM, Bagatta M, Carboni A, Crucitti P, Moliterni VC, Ranalli P, Mandolini GJG.** 2003. The inheritance of chemical phenotype in *Cannabis sativa* L. *Genetics* 163, 335-346.
- de Mendiburu F.** 2017. agricolae: Statistical procedures for agricultural research. R package version 1.2-8. <https://CRAN.R-project.org/package=agricolae> Accessed January 2021.

- Elshire RJ, Glaubitz JC, Sun Q, Poland JA, Kawamoto K, Buckler ES, Mitchell SE.** 2011. A robust, simple genotyping-by-sequencing (GBS) approach for high diversity species. *PLoS ONE* 6, e19379.
- Enquist BJ, Niklas KJ.** 2002. Global allocation rules for patterns of biomass partitioning in seed plants. *Science* 295, 1517-1520.
- Eugster MA, Leisch F.** 2009. From spider-man to hero – Archetypal analysis in R. *Journal of Statistical Software* 30, 1-23.
- Faeti V, Mandolino G, Ranalli P.** 1996. Genetic diversity of *Cannabis sativa* L. germplasm based on RAPD markers. *Plant Breeding* 115, 367-370.
- Faux AM, Berhin A, Dauguet N, Bertin P.** 2014. Sex chromosome and quantitative sex expression in monoecious hemp (*Cannabis sativa* L.). *Euphytica* 196, 183-197.
- Fike JH, Darby H, Johnson BL, Smart LB, Williams DW.** 2020. Industrial hemp in the USA: A brief synopsis. In: Grégorio C, Lichtfouse E. *Sustainable agriculture reviews 42: Hemp production and applications*, 89-109.
- Fischler MA, Bolles RC.** 1981. Random sample consensus: a paradigm for model fitting with applications to image analysis and automated cartography. *Communications of the ACM* 24, 381-395.
- Gitelson A, Merzlyak M.** 1998. Remote sensing of chlorophyll concentration in higher plant leaves. *Advances in Space Research* 22, 689-692.
- Gitelson A, Gritz Y, Merzlyak M.** 2003. Relationships between leaf chlorophyll content and spectral reflectance and algorithms for non-destructive chlorophyll assessment in higher plant leaves. *Journal of Plant Physiology* 160, 271-282.
- Glaubitz JC, Casstevens TM, Lu F, Harriman J, Elshire RJ, Sun Q, Buckler ES.** 2014. TASSEL-GBS: A high capacity genotyping by sequencing analysis pipeline. *PLoS ONE* 9, e90346.
- Goudet J, Jombart T.** 2021. hierfstat: Estimation and tests of hierarchical F-statistics. <https://github.com/jgx65/hierfstat> Accessed January 2021.

- Grassa CJ, Wenger JP, Dabney C, Poplawski SG, Motley ST, Michael TP, Schwartz CJ, Weiblen GD.** 2018. A new *Cannabis* genome assembly associates elevated cannabidiol (CBD) with hemp introgressed into marijuana. *New Phytologist* 230, 1665-1679.
- Grömping U.** 2006. Relative importance for linear regression in R: The package relaimpo. *Journal of Statistical Software* 17, 1-27.
- Hall J, Bhattarai SP, Midmore DJ.** 2014. The effects of photoperiod on phenological development and yields of industrial hemp. *Journal of Natural Fibers* 11, 87-106.
- Han MV, Zmasek CM.** 2009. phyloXML: XML for evolutionary biology and comparative genomics. *BMC Bioinformatics* 10, 356.
- Hirata K.** 1924. Cytological basis of the sex determination in *Cannabis sativa* L. *Japan Journal of Genetics* 4, 198-201.
- Huete A, Didan K, Miura T, Rodriguez EP, Gao X, Ferreira LG.** 2002. Overview of the radiometric and biophysical performance of the MODIS vegetation indices. *Remote Sensing of Environment* 83, 195-213.
- Jin D, Henry P, Shan J, Chen J.** 2021. Identification of phenotypic characteristics in three chemotype categories in the genus *Cannabis*. *HortScience* 56, 481-490.
- Jombart T, Devillard S, Balloux.** 2017. Discriminant analysis of principal components: a new method for the analysis of genetically structured populations. *BMC Genetics* 11, 94.
- Katabuchi M.** 2015. LeafArea: An R package for rapid digital image analysis of leaf area. *Ecological Research* 30, 1073-1077.
- Kleiman D, Aarssen LW.** 2007. The leaf size/number trade-off in trees. *Journal of Ecology* 95, 376-382.
- Kovalchuk I, Pellino M, Rigault P, et al.** 2020. The genomics of *Cannabis* and its close relatives. *Annual Reviews of Plant Biology* 71, 713-739.
- Kurtz LE, Mahoney JD, Brand MH, Lubell-Brand JD.** 2020. Comparing genotypic and phenotypic variation of selfed and outcrossed progeny of hemp. *HortScience* 55, 1206-1209.

- Legendre P.** 2014. lmodel2: Model II regression. R package version 1.7-2. <https://CRAN.R-project.org/package=lmodel2> Accessed January 2021.
- Li H, Durbin R.** 2009. Fast and accurate short read alignment with Burrows-Wheeler transform. *Bioinformatics* 25, 1754-1760.
- Lindeman RH, Merenda PF, Gold RZ.** 1980. Introduction to Bivariate and Multivariate Analysis, Glenview IL: Scott, Foresman.
- Liu Y, Li G, Wu X, Niklas KJ, Yang Z, Sun S.** 2021. Linkage between species traits and plant phenology in an alpine meadow. *Oecologia* doi: 0.1007/s00442-020-04846-y.
- Lubell JD, Brand MH.** Foliar sprays of silver thiosulfate produce male flowers on hemp plants. *HortTechnology* 28, 743-747.
- Marsan AP, Castiglioni P, Fusari F, et al.** 1998. Genetic diversity and its relationship to hybrid performance in maize as revealed by RFLP and AFLP markers. *Theoretical and Applied Genetics* 96, 219-227.
- McPartland JM.** 2018. *Cannabis* systematics at the levels of family, genus, and species, *Cannabis and Cannabinoid Research* 3, 203-212.
- Menzel MY.** 1964. Meiotic chromosomes of monoecious Kentucky hemp (*Cannabis sativa*). *Bulletin of the Torrey Botanical Club* 91, 193-205.
- Moher M, Jones M, Zheng Y.** 2021. Photoperiodic stress of in vitro *Cannabis sativa* plants. *HortScience* 56, 108-113.
- Moliterni VMC, Cattivelli L, Ranalli P, Mandolino G.** 2004. The sexual differentiation of *Cannabis sativa* L.: A morphological and molecular study. *Euphytica* 140, 95-106.
- Niklas KJ.** 1995. Size-dependent allometry of tree height, diameter and trunk taper. *Annals of Botany* 75, 217-227.
- Otsu N.** 1979. A threshold selection method from gray-level histograms. *IEEE Transactions on Systems, Man, and Cybernetics* 9, 62-66.

- Petit J, Salentijn EM, Paulo MJ, Denneboom C, Trindade LM.** 2020. Genetic architecture of flowering time and sex determination in hemp (*Cannabis sativa* L.): A genome-wide association study. *Frontiers in Plant Science* 11, 1704.
- Petzoldt T.** 2017. growthrates: Estimate growth rates from experimental data. R package version 0.7.0. <https://CRAN.R-project.org/package=growthrates> Accessed January 2021.
- Punja ZK, Collyer D, Scott C, Lung S, Holmes J, Sutton D.** 2019. Pathogens and molds affecting production and quality of *Cannabis sativa* L. *Frontiers in Plant Science* 10, 1120.
- Punja ZK, Holmes J.** 2020. Hermaphroditism in marijuana (*Cannabis sativa* L.) inflorescences - impact on floral morphology, seed formation, progeny sex ratios, and genetic variation. *Frontiers in Plant Science* 11, 718.
- Punja ZK, Scott C.** 2020. Evaluation of disease management approaches for powdery mildew on *Cannabis sativa* L. (marijuana) plants. *Canadian Journal of Plant Pathology* doi: 10.1080/07060661.2020.1836026.
- Qi J, Chehbouni A, Huete A, Kerr Y, Sorooshian S.** 1994. A modified soil adjusted vegetation index. *Remote Sensing of Environment* 48, 119-126.
- R Core Team.** 2017. R: A language and environment for statistical computing. R Foundation for Statistical Computing. <http://www.R-project.org/>.
- Ram HYM, Sett R.** 1982. Induction of fertile male flowers in genetically female *Cannabis sativa* plants by silver nitrate and silver thiosulphate anionic complex. *Theoretical and Applied Genetics* 62, 369-375.
- Rondeaux G, Steven M, Baret F.** 1996. Optimization of soil-adjusted vegetation indices. *Remote Sensing of Environment* 55, 95-107.
- Rouse J, Haas R, Schell J, Deering D.** 1973. Monitoring vegetation systems in the Great Plains with ERTS. Third ERTS Symposium, NASA pp. 309-317.
- Salentijn EMJ, Petit J, Trindade LM.** 2019. The complex interactions between flowering behavior and fiber quality in hemp. *Frontiers in Plant Science* 10, 614.

- Sawler J, Stout JM, Gardner KM, et al.** 2015. The genetic structure of marijuana and hemp. *PLoS ONE* 10, e0133292.
- Schindelin J, Arganda-Carreras I, Frise E, et al.** 2012. Fiji: An open-source platform for biological-image analysis. *Nature Methods* 9, 676-682.
- Small E.** 1972. Infertility and chromosomal uniformity in *Cannabis*. *Canadian Journal of Botany* 50, 1947-1949.
- Small E.** 2015. Evolution and classification of *Cannabis sativa* (marijuana, hemp) in relation to human utilization. *The Botanical Review* 81, 189-294.
- Soori A, Fatahi R, Haak DC, Salami SA, Bombarely A.** 2017. Assessment of genetic diversity and population structure in Iranian *Cannabis* germplasm. *Scientific Reports* 7, 15668.
- Spitzer-Rimon B, Duchin S, Bernstein N, Kamenetsky R.** 2019. Architecture and florogenesis in female *Cannabis sativa* plants. *Frontiers in Plant Science* 10, 350.
- Stack GM, Toth JA, Carlson CH, et al.** 2021. Season-long contrast of high-cannabinoid hemp (*Cannabis sativa* L.) cultivars reveals variation in cannabinoid accumulation, flowering time, and disease resistance. *GCB Bioenergy* 13, 546-561.
- Szarka D, Tymon L, Amsden B, Dixon E, Judy J, Gauthier N.** 2019. First report of powdery mildew caused by *Golovinomyces spadicus* on industrial hemp (*Cannabis sativa*) in Kentucky. *Plant Disease* 103, 1773-1773.
- Taura F, Morimoto S, Shoyama Y.** 1995. Cannabigerolic acid, a cannabinoid from *Cannabis sativa*. *Phytochemistry* 39, 457-458.
- Thiessen LD, Schappe T, Cochran S, Hicks K, Post AR.** 2020. Surveying for potential diseases and abiotic disorders of industrial hemp (*Cannabis sativa*) production. *Plant Health Progress* 21, 321-332.
- Toth JA, Stack GM, Cala AR, et al.** 2020. Development and validation of genetic markers for sex and cannabinoid chemotype in *Cannabis sativa* L. *GCB Bioenergy* 12, 213-222.
- van Bakel H, Stout JM, Cote AG, Tallon CM, Sharpe AG, Hughes TR, Page JE.** 2011. The draft genome and transcriptome of *Cannabis sativa*. *Genome Biology* 12, R102.



- Vavilov NI.** 1926. The origin of the cultivation of ‘primary’ crops, in particular cultivated hemp. Studies on the Origin of Cultivated Plants. Institute of Applied Botany and Plant Breeding, Leningrad, USSR, 221-223.
- Vergara D, Feathers C, Huscher EL, Holmes B, Haas JA, Kane NC.** 2021. Widely assumed phenotypic associations in *Cannabis sativa* lack a shared genetic basis. PeerJ 9, e10672.
- Warf B.** 2014. High points: An historical geography of *Cannabis*. Geographical Review 104, 414-438.
- Weldon WA, Ullrich MR, Smart LB, Smart CD, Gadoury DM.** 2019. Cross infectivity of powdery mildew isolates originating from hemp (*Cannabis sativa*) and Japanese hop (*Humulus japonicus*) in New York. Plant Health Progress 21, 47-53.
- Woebbecke DM, Meyer GE, Von Bargaen K, Mortensen DA.** 1995. Color indices for weed identification under various soil, residue, and lighting conditions. Transactions of the ASAE 38, 259-269.
- Yang Z, Willis P, Mueller R.** 2008. Impact of band-ratio enhanced AWIFS image to crop classification accuracy. Proceedings of the Pecora 17 Remote Sensing Symposium, Denver, CO.

## Tables

**Table 1.** Cornell Hemp accession numbers, family pedigree, and inferred group of the seed parent.

| <b>Accession</b> | <b>Seed parent</b>         | <b>Pollen parent</b>       | <b>N</b> | <b>Inferred group</b> |
|------------------|----------------------------|----------------------------|----------|-----------------------|
| GVA-H-19-1153    | A2R4 #301                  | TJ's CBD                   | 15       | Feral/Fiber           |
| GVA-H-19-1154    | AC/DC × Otto II #4         | TJ's CBD                   | 15       | BaOx/Otto II          |
| GVA-H-19-1157    | Candida #1                 | TJ's CBD                   | 15       | Cherry                |
| GVA-H-19-1160    | Cherry Wine #4             | TJ's CBD                   | 15       | Cherry                |
| GVA-H-19-1161    | Cornell-OP #1              | TJ's CBD                   | 15       | West Coast            |
| GVA-H-19-1162    | Cornell-OP #2              | TJ's CBD                   | 15       | T1/R4                 |
| GVA-H-19-1164    | Double Cherries #2         | TJ's CBD                   | 15       | Cherry                |
| GVA-H-19-1166    | FL 58                      | TJ's CBD                   | 15       | Cherry                |
| GVA-H-19-1169    | Otto II #3                 | TJ's CBD                   | 15       | BaOx/Otto II          |
| GVA-H-19-1170    | R4 #6                      | TJ's CBD                   | 11       | T1/R4                 |
| GVA-H-19-1171    | The Housewife #1           | TJ's CBD                   | 15       | West Coast            |
| GVA-H-19-1174    | Otto II #3 × NEBf          | TJ's CBD                   | 15       | BaOx/Otto II          |
| GVA-H-19-1177    | R4 × Cherry Wine #8        | TJ's CBD                   | 15       | T1/R4                 |
| GVA-H-19-1178    | R4 × Cherry Wine #10       | TJ's CBD                   | 15       | T1/R4                 |
| GVA-H-19-1197    | NY Feral #1                | TJ's CBD                   | 15       | T1/R4                 |
| GVA-H-19-1205    | TJ's CBD S <sub>1</sub> #4 | TJ's CBD S <sub>1</sub> #4 | 15       | West Coast            |
| GVA-H-19-1206    | TJ's CBD S <sub>1</sub> #5 | TJ's CBD S <sub>1</sub> #5 | 13       | West Coast            |
| GVA-H-20-1001    | Candida #1                 | TJ's CBD S <sub>1</sub> #5 | 13       | Cherry                |
| GVA-H-20-1028    | (PR × FD) × NEBf #1        | TJ's CBD                   | 15       | Feral/Fiber           |
| GVA-H-20-1063    | Lifter × TJ's CBD #89      | TJ's CBD                   | 15       | West Coast            |
| GVA-H-20-1072    | A2R4 #21                   | TJ's CBD S <sub>1</sub> #4 | 13       | Feral/Fiber           |
| GVA-H-20-1087    | R4 #6 × TJ's CBD #11       | TJ's CBD S <sub>1</sub> #4 | 15       | T1/R4                 |
| GVA-H-20-1117    | R4 #6 × TJ's CBD #15       | TJ's CBD S <sub>1</sub> #4 | 15       | T1/R4                 |

**Table 2.** Trait abbreviations, descriptions, units, as well as population means, range (min - max), coefficient of variation (CV), and heritability ( $h^2$ ). For field-collected traits with repeated measurements, the final measurement is reported. The common parent was not included in population level statistics.

| Abbreviation               | Description                   | Units                           | Mean  | Range        | CV   | $h^2$ |
|----------------------------|-------------------------------|---------------------------------|-------|--------------|------|-------|
| <i>Architecture</i>        |                               |                                 |       |              |      |       |
| HT                         | Plant height                  | cm                              | 157.7 | 78 - 255     | 0.19 | 0.83  |
| BPAIR                      | Branching pairs in canopy     | #                               | 7.45  | 4 - 16       | 0.26 | 0.72  |
| INL                        | Internode length              | cm                              | 7.07  | 3.1 - 12.5   | 0.21 | 0.63  |
| MCD                        | Maximum canopy diameter       | cm                              | 125.9 | 61 - 179     | 0.19 | 0.83  |
| MCDH                       | Height at max canopy diameter | cm                              | 85.9  | 40 - 160     | 0.24 | 0.73  |
| TRKL                       | Trunk length to first branch  | cm                              | 12.2  | 1 - 50       | 0.70 | 0.60  |
| KITE                       | Kite area                     | m <sup>2</sup>                  | 0.94  | 0.19 - 2.14  | 0.32 | 0.82  |
| KHR                        | Kite hypotenuse ratio         | -                               | 0.97  | 0.56 - 1.67  | 0.22 | 0.36  |
| KBA                        | Kite branch angle             | °                               | 41.2  | 19.9 - 67.2  | 0.16 | 0.45  |
| KC                         | Kite circularity              | 0-1                             | 0.76  | 0.57 - 0.79  | 0.03 | 0.56  |
| DIA                        | Basal stem diameter           | cm                              | 4.44  | 1.6 - 6.9    | 0.23 | 0.85  |
| VOL                        | Primary stem volume           | cm <sup>3</sup>                 | 888.4 | 54.9 - 1989  | 0.23 | 0.81  |
| <i>Foliar</i>              |                               |                                 |       |              |      |       |
| LFLT                       | Leaflet number                | #                               | 5.37  | 3 - 7        | 0.25 | 0.80  |
| MLFW                       | Middle leaflet width          | cm                              | 1.70  | 0.89 - 2.89  | 0.21 | 0.84  |
| MLFA                       | Middle leaflet area           | cm <sup>2</sup>                 | 16.4  | 7.2 - 32.3   | 0.28 | 0.79  |
| LFDW                       | Leaf dry weight               | g                               | 0.25  | 0.07 - 0.57  | 0.41 | 0.84  |
| LFA                        | Leaf area                     | cm <sup>2</sup>                 | 42.3  | 11.5 - 97.8  | 0.41 | 0.84  |
| LFL                        | Leaf length                   | cm                              | 14.3  | 10.8 - 20.0  | 0.11 | 0.62  |
| LFP                        | Leaf perimeter                | cm                              | 102.1 | 37.9 - 162.7 | 0.27 | 0.80  |
| SLA                        | Specific leaf area            | cm <sup>2</sup> g <sup>-1</sup> | 167.2 | 122 - 219.3  | 0.10 | 0.59  |
| PTDW                       | Petiole dry weight            | g                               | 0.03  | 0.004 - 0.08 | 0.54 | 0.80  |
| PTA                        | Petiole area                  | cm <sup>2</sup>                 | 0.82  | 0.2 - 2.2    | 0.43 | 0.79  |
| PTL                        | Petiole length                | cm                              | 3.86  | 1.2 - 8.0    | 0.32 | 0.73  |
| PTP                        | Petiole perimeter             | cm                              | 9.06  | 3.36 - 18.04 | 0.30 | 0.72  |
| SPA                        | Specific petiole area         | cm <sup>2</sup> g <sup>-1</sup> | 34.8  | 20.4 - 74.8  | 0.24 | 0.84  |
| <i>Phenology</i>           |                               |                                 |       |              |      |       |
| PTFD                       | Pre-terminal flowering day    | DAP                             | 59.3  | 28 - 85      | 0.24 | 0.85  |
| TFD                        | Terminal flowering day        | DAP                             | 68.9  | 35 - 92      | 0.22 | 0.84  |
| <i>Physiology</i>          |                               |                                 |       |              |      |       |
| CCI                        | Chlorophyll content index     | -                               | 51.2  | 34.8 - 78.3  | 0.15 | 0.81  |
| GLI                        | Green leaf index              | -                               | 0.12  | 0.08 - 0.19  | 0.14 | 0.70  |
| GR                         | Mean growth rate              | cm day <sup>-1</sup>            | 1.90  | 0.43 - 3.4   | 0.24 | 0.80  |
| DMG                        | Day of maximum growth         | DAP                             | 43.5  | 21 - 70      | 0.17 | 0.47  |
| <i>Pathology</i>           |                               |                                 |       |              |      |       |
| PM                         | Powdery mildew severity       | %                               | 37.8  | 1 - 95       | 0.52 | 0.67  |
| AUDPC                      | PM disease progress           | AUDPC                           | 957.8 | 18.5 - 2433  | 0.55 | 0.69  |
| <i>Biomass Yield</i>       |                               |                                 |       |              |      |       |
| WBM                        | Whole plant wet biomass       | kg                              | 6.31  | 1.22 - 13.1  | 0.35 | 0.79  |
| DBM                        | Whole plant dry biomass       | kg                              | 1.84  | 0.28 - 3.95  | 0.39 | 0.80  |
| DSBM                       | Dry stripped floral biomass   | kg                              | 1.11  | 0.27 - 2.15  | 0.32 | 0.81  |
| <i>Cannabinoid Content</i> |                               |                                 |       |              |      |       |
| THC                        | Tetrahydrocannabinol          | %                               | 1.19  | 0.14 - 9.72  | 1.53 | 0.82  |

|                          |                               |   |      |             |      |      |
|--------------------------|-------------------------------|---|------|-------------|------|------|
| CBD                      | Cannabidiol                   | % | 8.73 | 0.14 - 16.8 | 0.32 | 0.86 |
| CBC                      | Cannabichromene               | % | 0.52 | 0.09 - 2.03 | 0.57 | 0.84 |
| CBG                      | Cannabigerol                  | % | 0.27 | 0.03 - 0.70 | 0.41 | 0.74 |
| THCV                     | Tetrahydrocannabivarin        | % | 0.03 | 0.00 - 0.42 | 2.24 | 0.72 |
| CBDV                     | Cannabidivarin                | % | 0.16 | 0.01 - 3.79 | 2.43 | 0.76 |
| CBL                      | Cannabicyclol                 | % | 0.04 | 0.00 - 0.12 | 0.70 | 0.70 |
| <i>Cannabinoid Yield</i> |                               |   |      |             |      |      |
| $CB_{yield}$             | Total cannabinoids/100 × DSBM | g | 120  | 25 - 320    | 0.43 | 0.87 |
| $CBD_{yield}$            | Total CBD/100 × DSBM          | g | 100  | 2 - 290     | 0.51 | 0.90 |

---

## Figure Captions

**Fig. 1.** Genetic diversity of hemp. Using 190 hemp cultivars, crosses, and feral accessions, panels depict (A) unrooted neighbor-joining tree, (B) discriminant analysis of principal components (DAPC), (C) principal component analysis, (D) membership probability ordered by DAPC cluster and within-cluster membership, and (E) pairwise  $F_{ST}$ . DAPC clusters 1-7 inferred via Bayesian Information Criterion (BIC) ( $k = 1:19$ ) are labelled/colored according to the legend.

**Fig. 2.** Floral phenology. Ordered by mean pre-terminal flowering day, (A) family means ( $\pm$  standard error) for pre-terminal (blue points) and terminal (red points) flowering. The black dotted line represents daylength over the same time period on the alternate y-axis. Bold family names represent those families segregating for flowering date. Regression of (B) leaflet number and (C) day of maximum stem growth with pre-terminal flowering day, each represented in days after planting (DAP).

**Fig. 3.** Foliar relationships. Model II linear regression of log transformed (A) leafing intensity and leaf mass, (B) specific petiole area and leafing intensity, (C) specific petiole area and leaf mass, and (D) specific petiole area and leaf perimeter. For all panels, points are colored according to the number of leaflets, as shown in the legend.

**Fig. 4.** Canopy architecture. Violin plots of (A) kite area ( $m^2$ ) by family and (B) 2-D kite models in descending order. Mean canopy diameter height (MCDH) within 2-D kites are represented by filled circles and maximum trunk length (TRKL) by red lines. Axes of 2-D kites are 1:1. Archetype analysis (C) using the ratios of maximum canopy diameter (MCD) (x-axis) and maximum canopy diameter height (MCDH) (y-axis) to plant height, and simplex plot showing 2-D projected direction, with archetypes 1-4 depicted graphically in the legend. Scatterplot (D) of kite circularity and kite branch angle (KBA). Mean KBA for all  $F_1$  individuals, the common parent (CP), and KBA at maximum circularity ( $45^\circ$ ), are depicted in red, green, and black hashed lines, respectively. Point color opacity represents biomass accumulation, low to high. Model II linear regression of (E) log transformed wet biomass and basal stem diameter.

**Fig. 5.** Relationships of field phenotypes and aerial indices. For panels (A-D), the top figure is plot-level regression and the lower figure is family-level (mean  $\pm$  standard error). Regression of

(**A**) kite volume and canopy volume, (**B**) height and canopy height, (**C**) biomass yield and canopy volume, and (**D**) powdery mildew severity and modified non-linear index (MNLI).

**Fig. 6.** Dry floral biomass yield. Total cannabinoid yield (**A**) (dry stripped biomass  $\times$  total cannabinoid proportion) by family, ordered by means (yellow diamonds). Boxplots of (**B**) dry floral biomass ( $\text{kg plant}^{-1}$ ) and (**C**) dry floral biomass ( $\text{kg m}^2$ ) by flowering day (DAP). Vertical dotted red lines are population means.

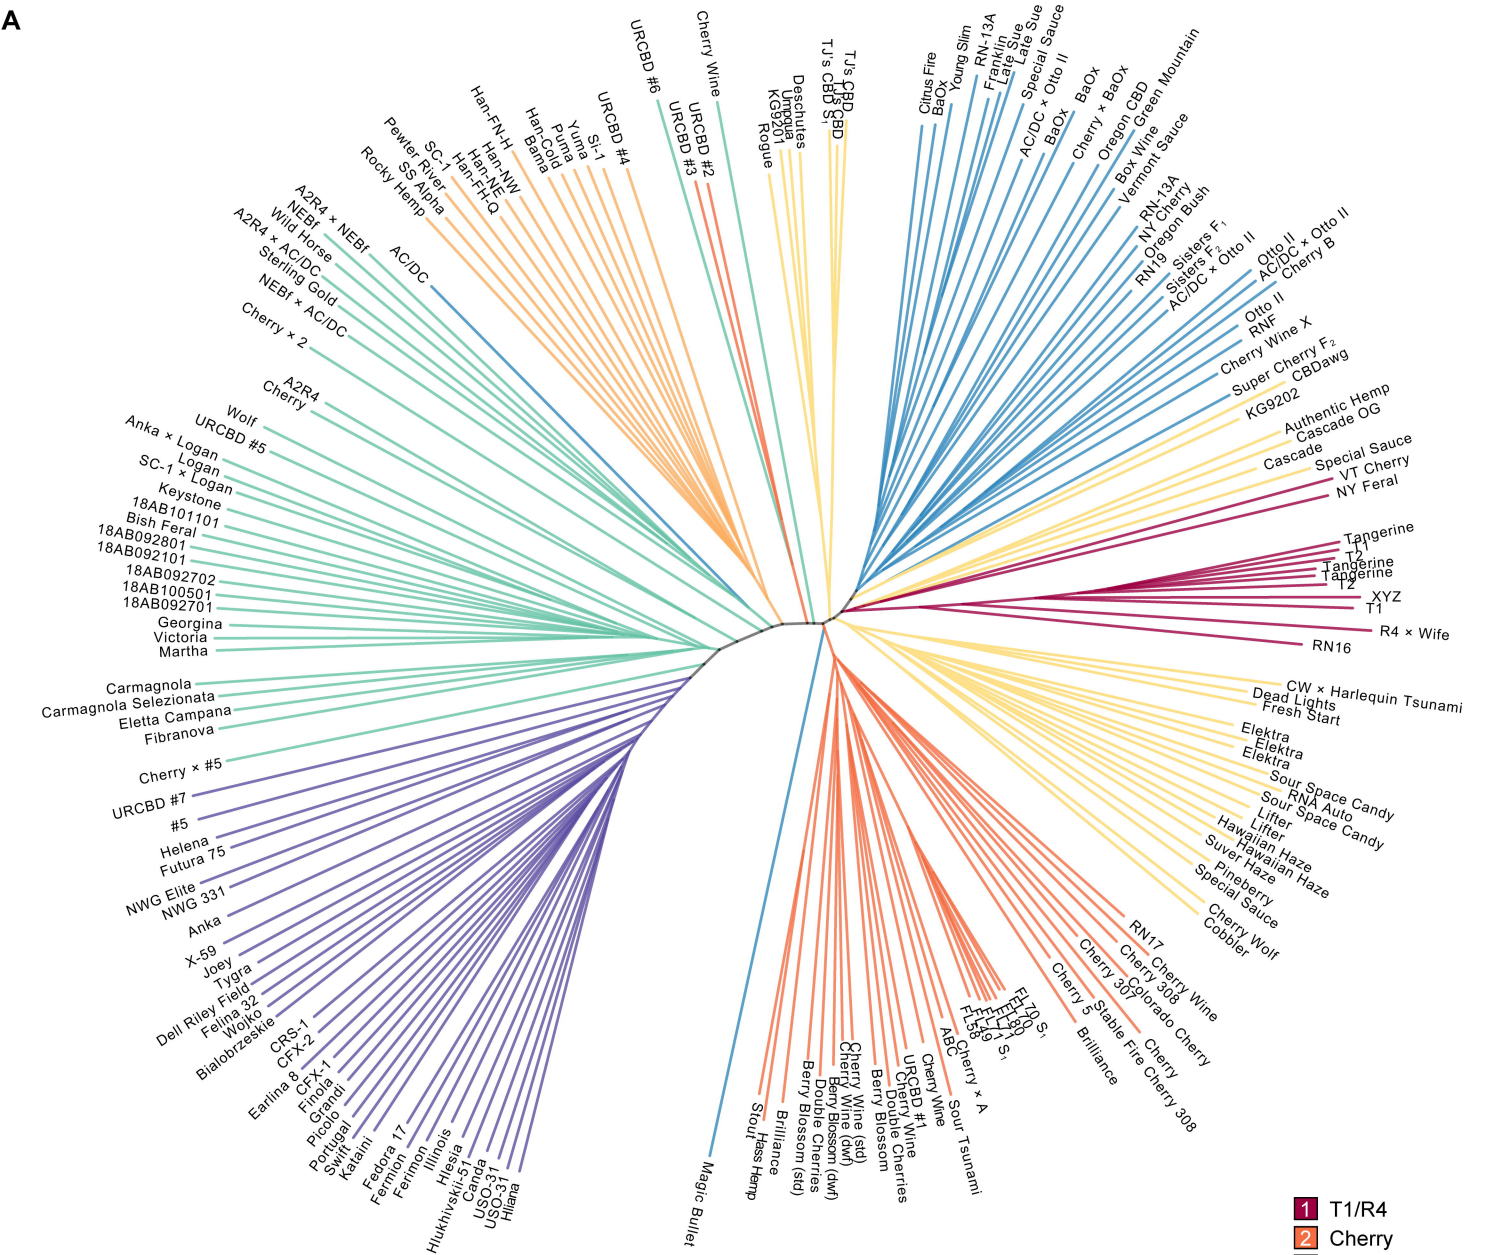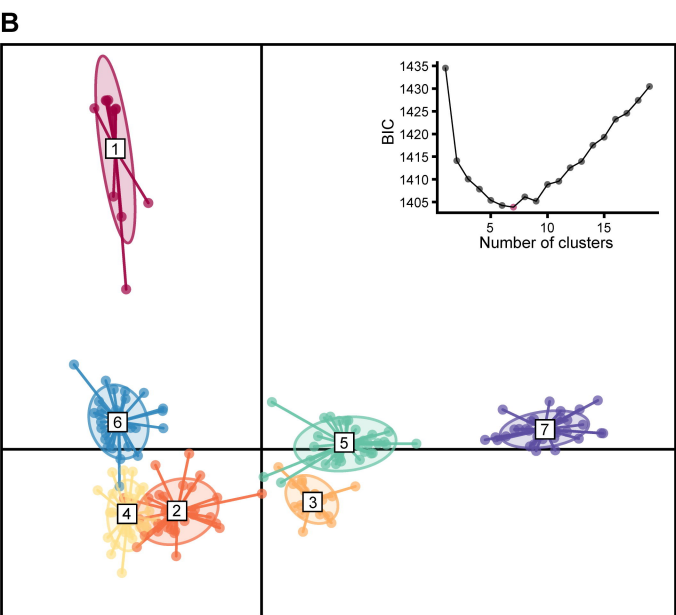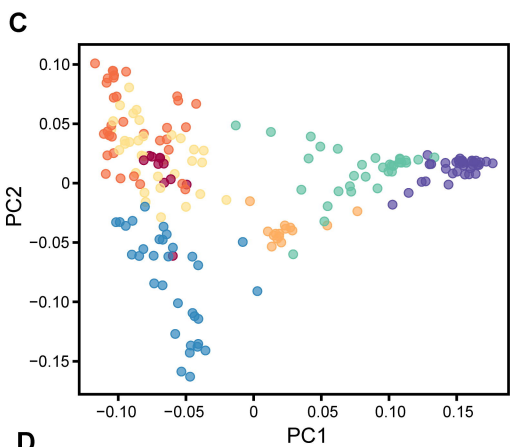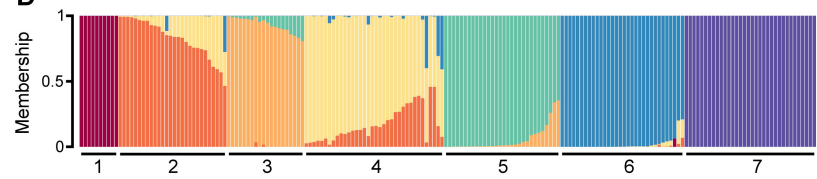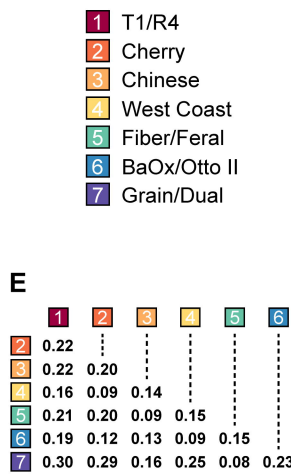



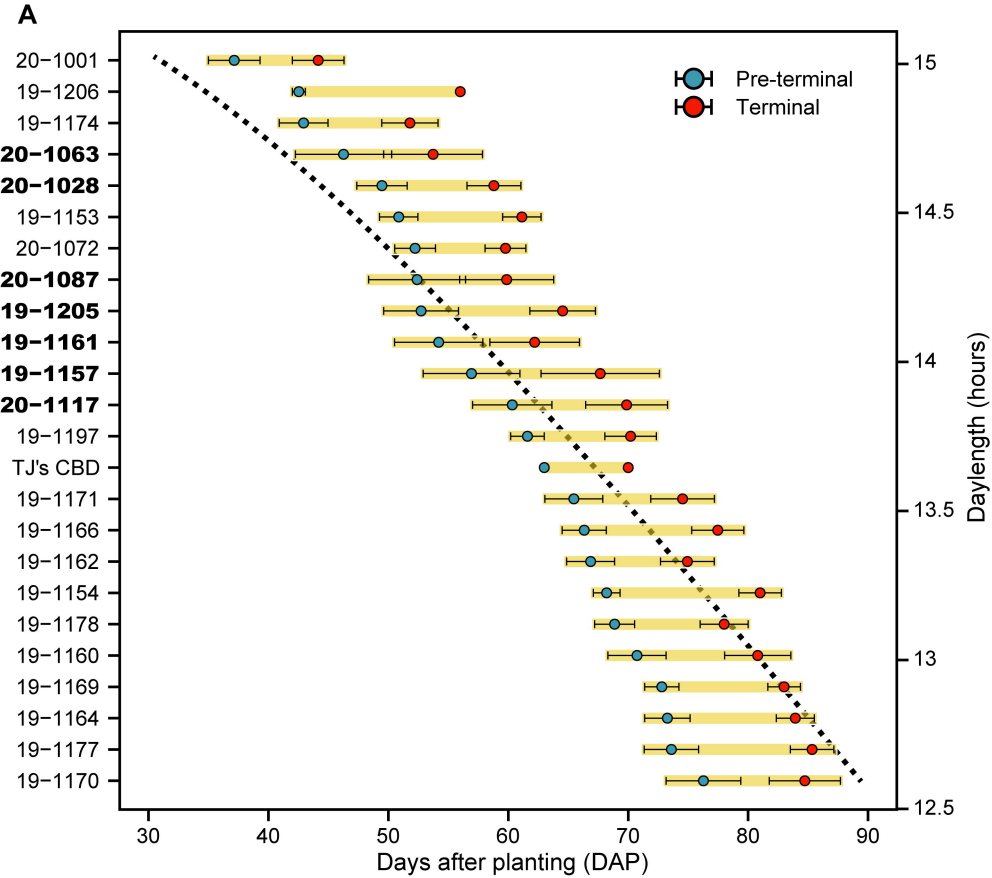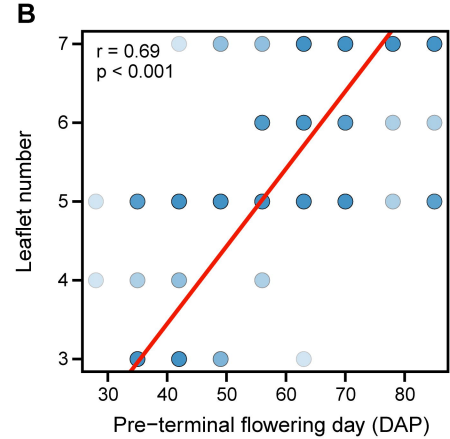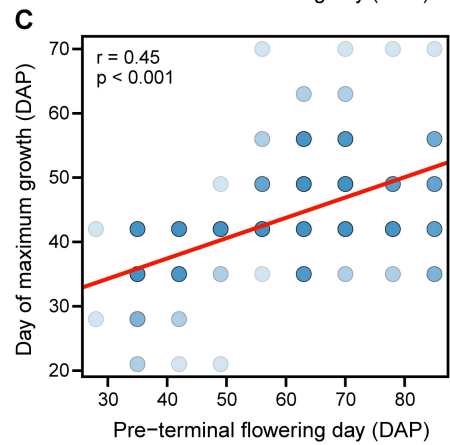



**A**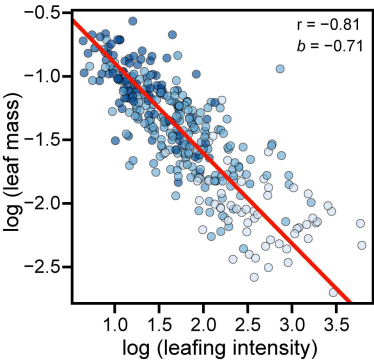**B**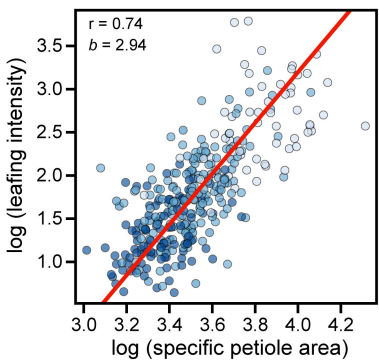**C**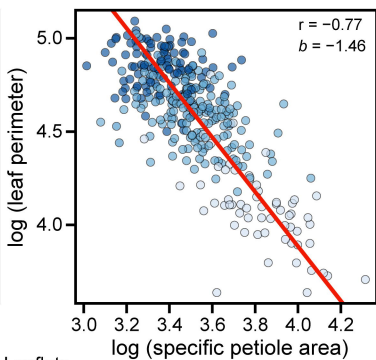**D**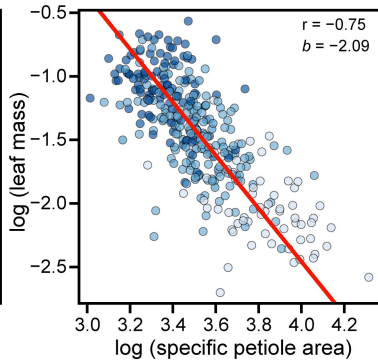

Leaflets

③ ④ ⑤ ⑥ ⑦

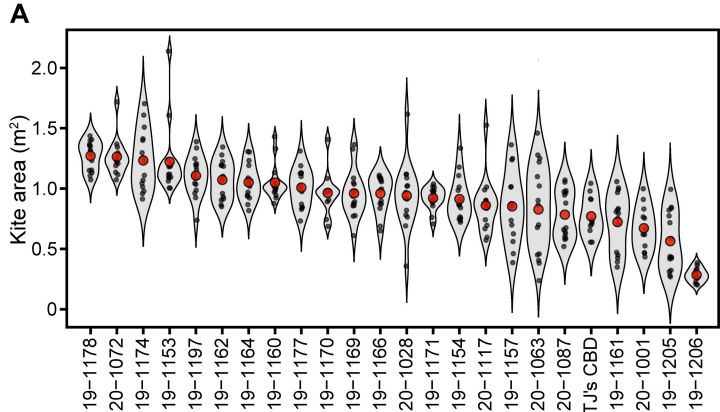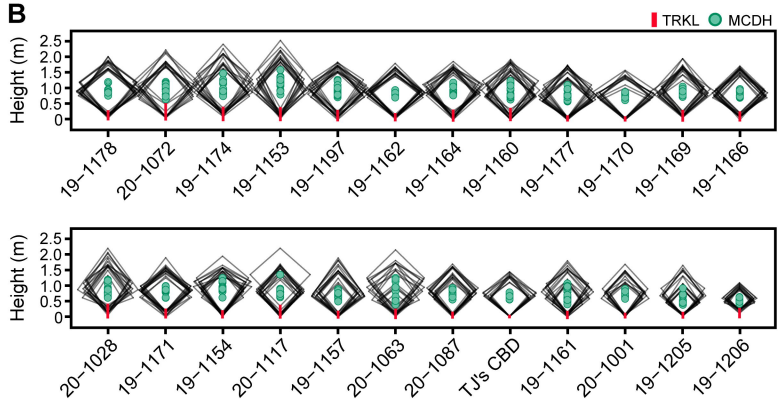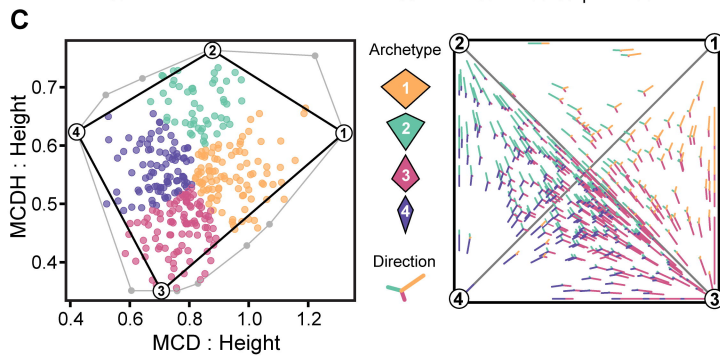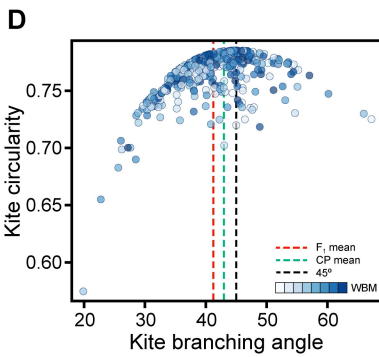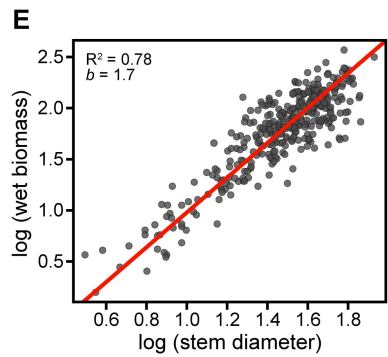

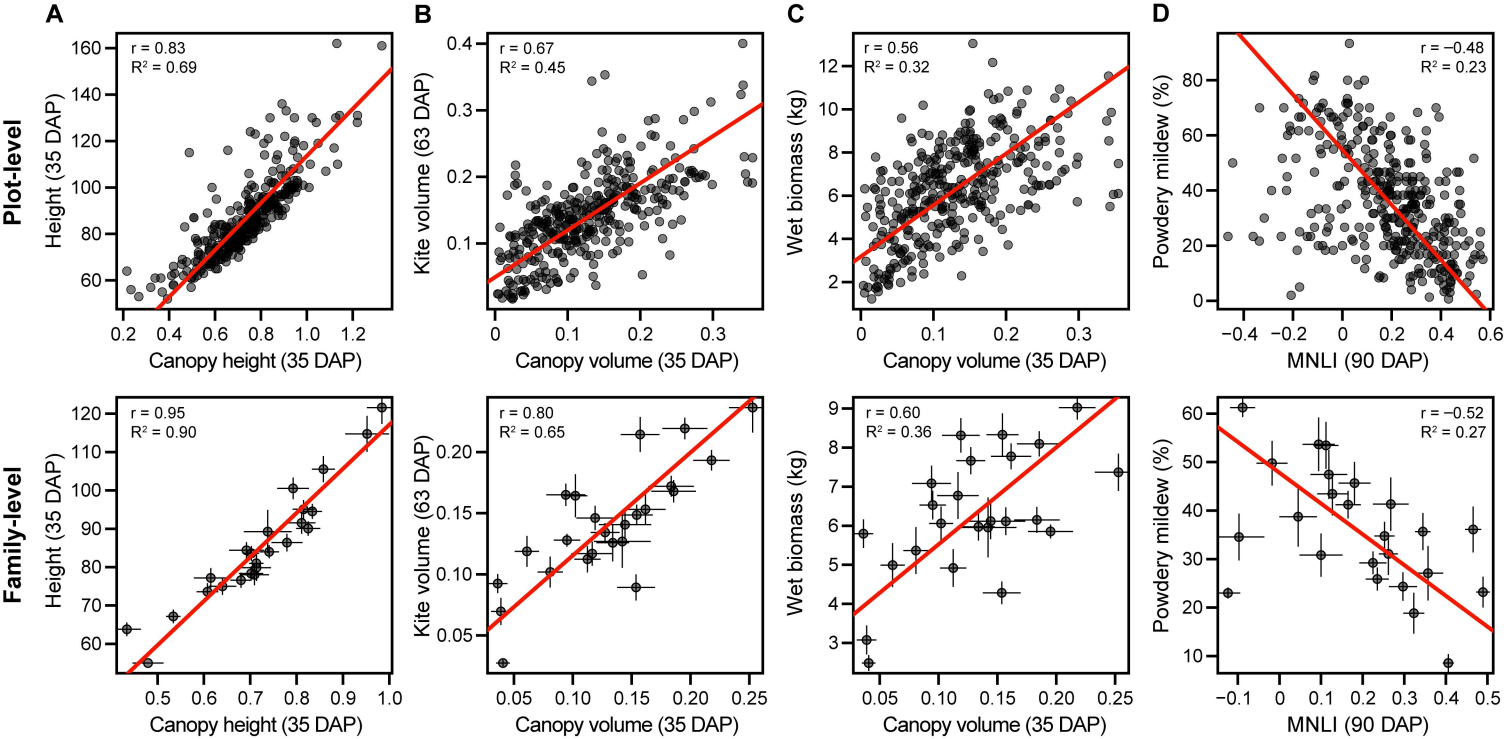

**A**

Total cannabinoid yield (g)

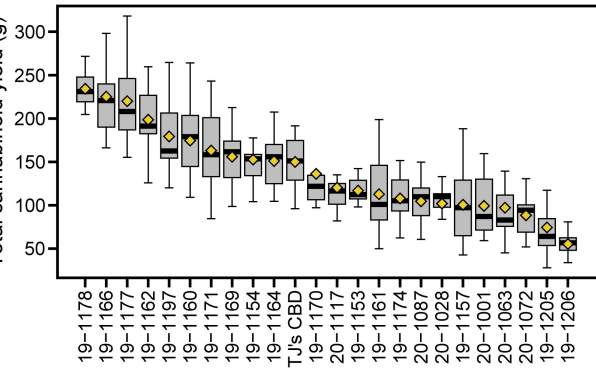**B**

Days to flower (DAP)

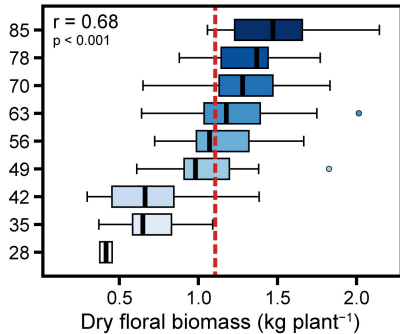**C**

Days to flower (DAP)

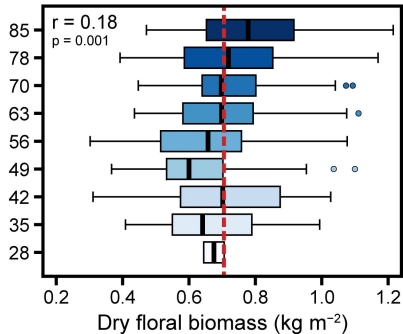

Source: http://biorxiv.org/content/10.1101/2021.05.09.443329v1.full.pdf
